# Supplementary material
Source: publisher figshare collection journal article supplement (https://frontiersin.figshare.com/ndownloader/files/17820638)
Supplement: Supplementary file 1 [file 17820638]

## Sheet: Sheet1
Person	Pub.id	Sustainability metric	Title	Authors	Journal	Publication Year	Volume	Issue	Beginning Page	Ending Page	Article Number	DOI	Source
MJ	bio.121	Biodiversity	BETA DIVERSITY AT DIFFERENT SPATIAL SCALES: PLANT COMMUNITIES IN ORGANIC AND CONVENT IONAL AGRICULTURE	Gabriel et al.	Ecological Applications	2006	16	5	2011	2021		10.1890/1051-0761(2006)016[2011:BDADSS]2.0.CO;2	Crowder et al. 2012
OS	bio.304	Biodiversity	Weed diversity in crop edges and inner fields of organic and conventional dryland winter cereal crops in NE Spain	Romero et al.	Agriculture, Ecosystems & Environment	2008	124	1 to 2	97	104		10.1016/j.agee.2007.08.002	Crowder et al. 2012
OS	bio.305	Biodiversity	The effects of landscape complexity on arable weed species diversity in organic and conventional farming	Roschewitz et al.	Journal of Applied Ecology	2005	42		873	882		10.1111/j.1365-2664.2005.01072.x	Crowder et al. 2012
OS	bio.378	Biodiversity	Farmland as stopover habitat for migrating birds – effects of organic farming and landscape structure	Danhardt et al.	Oikos	2010	119		1114	1125		10.1111/j.1600-0706.2009.18106.x	Crowder et al. 2012
JMT	bio.24	Biodiversity	Does hedgerow management on organic farms benefit small mammal populations?	Bates & Harris	Agriculture, Ecosystems & Environment	2009	129	1 to 3	124	130		10.1016/j.agee.2008.08.002	Crowder et al. 2012
JMT	bio.26	Biodiversity	Agroecology of Birds in Organic and Nonorganic Farmland	Beecher et al.	Conservation Biology	2002	16	6	1620	1631		10.1046/j.1523-1739.2002.01228.x	Crowder et al. 2012
JMT	bio.32	Biodiversity	Abundance and diversity of beneficial arthropods in conventional and “organic” carrot crops in New Zealand	Berry et al.	New Zealand Journal of Agricultural Research	1996	24	4	307	313		10.1080/01140671.1996.9513967	Crowder et al. 2012
JMT	bio.45	Biodiversity	The species composition and frequency of spiders (Araneae) in fields of winter wheat grown under different conditions in Germany	Basedow	Journal of Applied Entomology	1998	122		585	590			Crowder et al. 2012
OS	bio.383	Biodiversity	Effects of vineyard management on biodiversity at three trophic levels	Bruggisser et al.	Biological Conservation	210	143		1521	1528		10.1016/j.biocon.2010.03.034	Crowder et al. 2012
JMT	bio.55	Biodiversity	Impact of agricultural management on spider populations in the canopy of olive trees	Cardenas et al.	Biological Control	2006	38	2	188	195		10.1016/j.biocontrol.2006.02.004	Crowder et al. 2012
JMT	bio.62	Biodiversity	A comparison of bird populations on organic and conventional farm systems in southern Britain	Chamberlain et al.	Biological Conservation	1999	88	3	307	320		10.1016/S0006-3207(98)00124-4	Crowder et al. 2012
JMT	bio.77	Biodiversity	The Ladybeetle Community (Coleoptera: Coccinellidae) in Southern Olive Agroecosystems of Spain	Cotes et al.	Environmental Entomology	2010a	39	1	79	87		10.1603/EN09160	Crowder et al. 2012
MJ	bio.116	Biodiversity	Birds on organic and conventional farms in Ontario: partitioning effects of habitat and practices on species composition and abundance	Freemark & Kirck	Biological Conservation	2001	101	3	337	350		10.1016/S0006-3207(01)00079-9	Crowder et al. 2012
MJ	bio.156	Biodiversity	Conventional and Organic Cropping Systems at Suitia .6. Insect Populations in Barley.	Helenius	Agricultural Science in Finland	1990	62		349	355			Crowder et al. 2012
OS	bio.384	Biodiversity	Comparison of Predator and Pest Communities in Washington Potato Fields Treated with Broad-Spectrum, Selective, or Organic Insecticides	Koss et al.	Environmental Entomology	2005	34	1	87	95		10.1603/0046-225X-34.1.87	Crowder et al. 2012
MJ	bio.173	Biodiversity	Nematode-Trapping Fungi in Organic and Conventional Cropping Systems	Jaffee et al.	Ecology and Population Biology	1998	88		344	350		10.1094/PHYTO.1998.88.4.344	Crowder et al. 2012; Smith et al. 2018
RO	bio.258	Biodiversity	Nematode Communities in Organically and Conventionally Managed Agricultural Soils	Neher	The Journal of Nematology	1999	31	2	142	154			Crowder et al. 2012
OS	bio.385	Biodiversity	Nematode communities in soils of four farm cropping management systems	Neher & Olson	Pedobiologia	1999	43		430	438			Crowder et al. 2012
RO	bio.262	Biodiversity	Impact of long-term conventional and organic farming on the diversity of arbuscular mycorrhizal fungi	Oehl et al.	Oecologia	2004	138	4	574	583		10.1007/s00442-003-1458-2	Crowder et al. 2012; Smith et al. 2018
RO	bio.265	Biodiversity	Effects of organic and soil conservation management on specialist bird species	Ondine et al.	Agriculture, Ecosystems & Environment	2009	129	1 to 3	140	143		10.1016/j.agee.2008.08.004	Crowder et al. 2012
OS	bio.386	Biodiversity	A Comparison of Ground Beetle (Carabidae: Coleoptera) Communities in an Organic and Conventional Potato Crop	O'Sullivan & Gormally	Biological Agriculture & Horticulture	2002	20	2	99	110		10.1080/01448765.2002.9754954	Crowder et al. 2012
OS	bio.387	Biodiversity	Soil Macroinvertebrates, Heavy-Metals and Organochlorines in Low and High Input Apple Orchards and a Coppiced Woodland	Paoletti et al.	Pedobiologia	1995	39		20	33			Crowder et al. 2012
OS	bio.296	Biodiversity	Harmful effects of mustard bio-fumigants on entomopathogenic nematodes	Ramirez et al.	Biological Control	2009	48	2	147	154		10.1016/j.biocontrol.2008.10.010	Crowder et al. 2012
OS	bio.388	Biodiversity	Use of arthropods for the evaluation of the olive‐orchard management regimes	Ruano et al.	Agricultural and Forest Entomology	2004	6	2	111	120		10.1111/j.1461-9555.2004.00210.x	Crowder et al. 2012
KC	bio.364	Biodiversity	Bat activity and species richness on organic and conventional farms: impact of agricultural intensification	Wickramasinghe et al.	Journal of Applied Ecology	2003	40	6	984	993		10.1111/j.1365-2664.2003.00856.x	Crowder et al. 2012
JMT	bio.58	Biodiversity	Creating patches of native flowers facilitates crop pollination in large agricultural fields: mango as a case study	Carvalheiro et al.	Journal of Applied Ecology	2012	49	6	1373	1383		10.1111/j.1365-2664.2012.02217.x	Litchenberg et al. 2017
JMT	bio.59	Biodiversity	Pollination services decline with distance from natural habitat even in biodiversity-rich areas	Carvalheiro et al.	Journal of Applied Ecology	2010	47	4	810	820		10.1111/j.1365-2664.2010.01829.x	Litchenberg et al. 2017
JMT	bio.74	Biodiversity	Alpha and beta diversity of arthropods and plants in organically and conventionally managed wheat fields	Clough et al.	Journal of Applied Ecology	2007	44	4	804	812		10.1111/j.1365-2664.2007.01294.x	Litchenberg et al. 2017; Smith et al. 2018
MJ	bio.118	Biodiversity	Effects of organic farming, fencing and vegetation origin on spiders and beetles within shelterbelts on dairy farms	Fukuda et al.	New Zealand Journal of Agricultural Research	2011	54	3	155	176		10.1080/00288233.2011.591402	Litchenberg et al. 2017
MJ	bio.135	Biodiversity	Plant diversity and land Use under organic and conventional agriculture: a whole-farm approach	Gibson et al.	Journal of Applied Ecology	2007	44	4	792	803		10.1111/j.1365-2664.2007.01292.x	Litchenberg et al. 2017
MJ	bio.170	Biodiversity	Influence of Landscape Diversity and Agricultural Practices on Spider Assemblage in Italian Vineyards of Langa Astigiana (Northwest Italy)	Isaia et al.	Environmental Entomology	2006	35	2	297	307		10.1603/0046-225X-35.2.297	Litchenberg et al. 2017; Smith et al. 2018
MJ	bio.179	Biodiversity	Landscape simplification promotes weed seed predation by carabid beetles (Coleoptera: Carabidae)	Jonason et al.	Landscape Ecology	2013b	28		487	494			Litchenberg et al. 2017
RO	bio.199	Biodiversity	The area requirements of an ecosystem service: crop pollination by native bee communities in California	Kremen et al.	Ecology Letters	2004	7		1109	1119		10.1111/j.1461-0248.2004.00662.x	Litchenberg et al. 2017
RO	bio.210	Biodiversity	Pest damage and arthropod community structure in organic vs. conventional tomato production in California	Letourneau & Goldstein	Journal of Applied Ecology	2001	38	3	557	570		10.1046/j.1365-2664.2001.00611.x	Litchenberg et al. 2017
OS	bio.381	Biodiversity	Perennial habitat fragments, parasitoid diversity and parasitism in ephemeral crops	Letourneau et al.	Journal of Applied Ecology	2012	49		1405	1416		10.1111/1365-2664.12001	Litchenberg et al. 2017
OS	bio.382	Biodiversity	Habitat eradication and cropland intensification may reduce parasitoid diversity and natural pest control services in annual crop fields	Letourneau et al.	Elementa: Science of the Anthropocene	2015	3				000069	10.12952/journal.elementa.000069	Litchenberg et al. 2017
OS	bio.379	Biodiversity	Modelling pollination services across agricultural landscapes	Lonsdorf et al.	Annals of Botany	2009	103		1589	1600		10.1093/aob/mcp069	Litchenberg et al. 2017
RO	bio.224	Biodiversity	Parasitoid diversity reduces the variability in pest control services across time on farms	Macfadyen et al.	Proceedings of the Royal Society B	2011a	279		3387	3394		10.1098/rspb.2010.2673	Litchenberg et al. 2017; Smith et al. 2018
RO	bio.226	Biodiversity	Parasitoid control of aphids in organic and conventional farming systems	Macfadyen et al.	Agriculture, Ecosystems & Environment	2009b	113	1 to 2	14	18		10.1016/j.agee.2009.04.012	Litchenberg et al. 2017; Smith et al. 2018
RO	bio.227	Biodiversity	Landscape structure influences modularity patterns in farm food webs: consequences for pest control	Macfadyen et al.	Ecological Applications	2011b	21	2	516	524		10.1890/09-2111.1	Litchenberg et al. 2017; Smith et al. 2018
RO	bio.229	Biodiversity	Pesticide use within a pollinator-dependent crop has negative effects on the abundance and species richness of sweat bees, Lasioglossum spp., and on bumble bee colony growth	Mallinger et al.	Journal of Insect Conservation	2015	19	5	999	1010		10.1007/s10841-015-9816-z	Litchenberg et al. 2017; Smith et al. 2018
RO	bio.235	Biodiversity	Scale-dependent effects of landscape composition and configuration on natural enemy diversity, crop herbivory, and yields	Martin et al.	Ecological Applications	2016	26	2	448	462		10.1890/15-0856	Litchenberg et al. 2017
RO	bio.250	Biodiversity	Wild bee abundance and seed production in conventional, organic, and genetically modified canola	Morandin et al.	Ecological Applications	2005	15	3	871	881		10.1890/03-5271	Litchenberg et al. 2017; Smith et al. 2018
OS	bio.282	Biodiversity	Testing biotic indicator taxa: the sensitivity of insectivorous mammals and their prey to the intensification of lowland agriculture	Pocock & Jennings	Journal of Applied Ecology	2008	45		151	160		10.1111/j.1365-2664.2007.01361.x	Litchenberg et al. 2017; Smith et al. 2018
OS	bio.380	Biodiversity	Native bees buffer the negative impact of climate warming on honey bee pollination of watermelon crops	Rader et al.	Global Change Biology	2013	19		3103	3110		10.1111/gcb.12264	Litchenberg et al. 2017
OS	bio.320	Biodiversity	Soil fauna in sheep-grazed hill pastures under organic and conventional livestock management and in an adjacent ungrazed pasture	Schon et al.	Pedobiologia	2011	54	3	161	168		10.1016/j.pedobi.2011.01.001	Crowder et al. 2012; Litchenberg et al. 2017; Smith et al. 2018
KC	bio.368	Biodiversity	Native bees provide insurance against ongoing honey bee losses	Winfree et al.	Ecology Letters	2007	10	11	1105	1113		10.1111/j.1461-0248.2007.01110.x	Litchenberg et al. 2017
KC	bio.369	Biodiversity	Wild bee pollinators provide the majority of crop visitation across land-use gradients in New Jersey and Pennsylvania, USA	Winfree et al.	Journal of Applied Ecology	2008	45	3	793	802		10.1111/j.1365-2664.2007.01418.x	Litchenberg et al. 2017
JMT	bio.21	Biodiversity	Responses of plant, insect and spider biodiversity to local and landscape scale management intensity in cereal crops and grasslands	Batary et al.	Agriculture, Ecosystems and Environment	2012	146		130	136		10.1016/j.agee.2011.10.018	Litchtenberg et al. 2017
JMT	bio.40	Biodiversity	Determinants of Soil Microbial Communities: Effects of Agricultural Management, Season, and Soil Type on Phospholipid Fatty Acid Profiles	Bossio et al.	Microbial Ecology	1998	38	1	1	12		10.1007/s002489900	Lori et al. 2017
JMT	bio.49	Biodiversity	Microbial responses and nitrous oxide emissions during wetting and drying of organically and conventionally managed soil under tomatoes	Burger et al.	Biology and Fertility of Soils	2005	42	2	109	118		10.1007/s00374-005-0007-z	Lori et al. 2017; Smith et al. 2018
JMT	bio.1	Biodiversity	Response of soil microbial biomass and community structures to conventional and organic farming systems under identical crop rotations	Esperschütz et al.	FEMS Microbiology Ecology	2007	61	1,1	26	37		10.1111/j.1574-6941.2007.00318.x	Lori et al. 2017
MJ	bio.129	Biodiversity	Microbial biomass, activity, and community structure in horticultural soils under conventional and organic management strategies	Ge et al.	European journal of soil biology	2013	58		122	128		10.1016/j.ejsobi.2013.07.005	Lori et al. 2017
MJ	bio.155	Biodiversity	Effects of fertilizer and spatial heterogeneity in soil pH on microbial biomass indices in a long-term field trial of organic agriculture	Heinze et al.	Plant and Soil	2010	328	42737	203	215		4120/10.1007/s11104-009-0102-2	Lori et al. 2017
RO	bio.203	Biodiversity	Soil biochemical indicators as a tool to assess the short-term impact of agricultural management on changes in organic C in a Mediterranean environment	Lagomarsino et al.	Ecological Indicators	2009	9	3	518	527		10.1016/j.ecolind.2008.07.003	Lori et al. 2017
RO	bio.205	Biodiversity	Soil biological properties, soil losses and corn yield in long-term organic and conventional farming systems	Larsen et al.	Soil and Tillage Research	2014	139		37	45		10.1016/j.still.2014.02.002	Lori et al. 2017
OS	bio.299	Biodiversity	Fruit and Soil Quality of Organic and Conventional Strawberry Agroecosystems	Reganold et al.	PLoS ONE	2010	5	9	e12346			10.1371/journal.pone.0012346	Lori et al. 2017
OS	bio.303	Biodiversity	Assessment of soil microbial diversity measurements as indicators of soil functioning in organic and conventional horticulture systems	Romaniuk et al.	Ecological Indicators	2011	11	5	1345	1353		10.1016/j.ecolind.2011.02.008	Lori et al. 2017; Smith et al. 2018
OS	bio.332	Biodiversity	Differences in soil enzyme activities, microbial community structure and short-term nitrogen mineralisation resulting from farm management history and organic matter amendments	Stark et al.	Soil biology & Biochemistry	2008	40	6	1352	1363		10.1016/j.soilbio.2007.09.025	Lori et al. 2017
OS	bio.356	Biodiversity	The functional significance of the microbial biomass in organic and conventionally managed soils	Wander et al.	Plant and Soil	1995	170	1	87	97		10.1007/BF02183057	Lori et al. 2017
JMT	bio.34	Biodiversity	Generalist predators in organically and conventionally managed grass-clover fields: implications for conservation biological control	Birkhofer et al.	Annals of Applied Biology	2008	153	2	271	280		10.1111/j.1744-7348.2008.00257.x	Montanez and Amarillo-Suarez 2014; Smith et al. 2018
KC	bio.363	Biodiversity	Abundance and Species Richness of Nocturnal Insects on Organic and Conventional Farms: Effects of Agricultural Intensification on Bat Foraging	Wickramasinghe et al.	Conservation Biology	2004	18	5	1283	1292		10.1111/j.1523-1739.2004.00152.x	Crowder et al. 2012; Montanez and Amarillo-Suarez 2014
OS	bio.389	Biodiversity	Entomofauna associated to horticultural crops under organic and conventional practices in Cordoba, Argentina	Zalazar & Salvo	Neotropical Entomology	2007	36		765	773		10.1590/S1519-566X2007000500019	Crowder et al. 2012
JMT	bio.3	Biodiversity	Soil and Foliar Arthropod Abundance and Diversity in Five Cropping Systems in the Coastal Plains of North Carolina	Adams et al.	Environmental Entomology	2017	46	4	771	783		10.1093/ee/nvx081	Smith et al. 2019
JMT	bio.15	Biodiversity	Diversity and abundance of arthropod by-catch in semiochemical-baited traps targeting apple clearwing moth (Lepidoptera: Sesiidae) in organic and conventional apple orchards in British Columbia, Canada	Aurelian et al.	Canadian Entomologist	2015	147	2	227	243		10.4039/tce.2014.47	Smith et al. 2019
JMT	bio.28	Biodiversity	Long-term weed dynamics and crop yields under diverse crop rotations in organic and conventional cropping systems in the Canadian prairies	Benaragama et al.	Field Crops Research	2016	196		357	367		10.1016/j.fcr.2016.07.010	Smith et al. 2019
JMT	bio.29	Biodiversity	Does yield loss due to weed competition differ between organic and conventional cropping systems?	Benaragama et al.	Weed Research	2016	56	4	274	283		10.1111/wre.12213	Smith et al. 2019
JMT	bio.31	Biodiversity	Compost, rapeseed rotation, and biocontrol agents significantly impact soil microbial communities in organic and conventional potato production systems	Bernard et al.	Applied Soil Ecology	2012	52		29	41		10.1016/j.apsoil.2011.10.002	Smith et al. 2019
JMT	bio.41	Biodiversity	Regional-scale analysis of arbuscular mycorrhizal fungi: the case of Burgundy vineyards	Bouffaud et al.	Journal International des Sciences de la Vigne et du Vin	2016	50	1	1	8		10.20870/oeno-one.2016.50.1.49	Smith et al. 2019
JMT	bio.52	Biodiversity	Weeds, aphids, and specialist parasitoids and predators benefit differently from organic and conventional cropping of winter cereals	Caballero-Lopez et al.	Journal of Pest Science	2012	85		81	88		10.1007/s10340-011-0409-7	Smith et al. 2019
JMT	bio.67	Biodiversity	Functional diversity and dominant populations of bacteria in banana plantation soils as influenced by long-term organic and conventional farming	Chou et al.	Applied Soil Ecology	2017	110		21	33		10.1016/j.apsoil.2016.11.002	Smith et al. 2019
JMT	bio.78	Biodiversity	Integrating soil physical and biological properties in contrasting tillage systems in organic and conventional farming	Crittenden & de Goede	European Journal of Soil Biology	2016	77		26	33		10.1016/j.ejsobi.2016.09.003	Smith et al. 2019
JMT	bio.87	Biodiversity	Management intensity and vegetation complexity affect web-building spiders and their prey	Diehl et al.	Oecologia	2013	173		579	589		10.1007/s00442-013-2634-7	Smith et al. 2019
MJ	bio.102	Biodiversity	Ground beetle species (Carabidae, Coleoptera) activity and richness in relation to crop type, fertility management and crop protection in a farm management comparison trial	Eyre et al.	Annals of Applied Biology	2012	161	2	169	179		10.1111/j.1744-7348.2012.00562.x	Smith et al. 2019
MJ	bio.125	Biodiversity	Landscape mosaic attributes for maintaining ground-living spider diversity in a biodiversity hotspot	Gaiger & Samways	Insect conservation and diversity	2014	7	5	470	479		10.1111/icad.12070	Smith et al. 2019
MJ	bio.134	Biodiversity	Soil microbial substrate properties and microbial community responses under irrigated organic and reduced-tillage crop and forage production systems.	Ghimire et al.	PloS one	2014	9	8			e103901	10.1371/journal.pone.0103901	Smith et al. 2019
MJ	bio.139	Biodiversity	Effect of pest management system on ÔEmpireÕ apple leaf phyllosphere populations	Glenn et al.	Scientia horticulturae	2015	183		58	65		10.1016/j.scienta.2014.12.009	Smith et al. 2019
MJ	bio.147	Biodiversity	Do functional diversity and trait dominance determine carbon storage in an altered tropical landscape?	Hager & Avalos	Oecologia	2017	184		569	581		10.1007/s00442-017-3880-x	Smith et al. 2019
MJ	bio.149	Biodiversity	Tree diversity on sustainably certified and conventional coffee farms in Central America	Haggar et al.	Biodiversity and conservation	2015	24	5	1175	1194		10.1007/s10531-014-0851-y	Smith et al. 2019
MJ	bio.146	Biodiversity	Crop agronomic performance under a six-year continuous organic no-till system and other tilled and conventionally-managed systems in the northern Great Plains of Canada	Halde et al.	Agriculture, Ecosystems and Environment	2015	213		121	130			Smith et al. 2019
MJ	bio.153	Biodiversity	Distinct soil microbial diversity under long-term organic and conventional farming.	Hartmann et al.	The ISME journal	2015	9	5	1177	1194		10.1038/ismej.2014.210	Smith et al. 2019
MJ	bio.174	Biodiversity	Prevalence and activity of entomopathogenic nematodes and their antagonists in soils that are subject to different agricultural practices	Jaffuel et al.	Agriculture, Ecosystems and Environment	2016	230		329	340		10.1016/j.agee.2016.06.009	Smith et al. 2019
MJ	bio.177	Biodiversity	A simple bioindication method to discriminate olive orchard management types using the soil arthropod fauna	Jerez-Valle et al.	Applied soil ecology	2014	76		42	51		10.1016/j.apsoil.2013.12.007	Smith et al. 2019
RO	bio.182	Biodiversity	Predator- and Scavenger-Mediated Ecosystem Services Determined by Distance to Field–Forest Interface in the Maine Lowbush Blueberry Agroecosystem	Jones et al.	Environmental Entomology	2016	45	5	1131	1140		10.1093/ee/nvw082	Smith et al. 2019
RO	bio.188	Biodiversity	Organic farming increases richness of fungal taxa in the wheat phyllosphere	Karlsson et al.	Molecular Ecology	2017	26	13	3424	3436		10.1111/mec.14132	Smith et al. 2019
RO	bio.193	Biodiversity	Subtle differences in birds detected between organic and nonorganic farms in Saskatchewan Prairie Parklands by farm pair and bird functional group	Kirk & Lindsay	Agriculture, Ecosystems and Environment	2017	246		184	201		10.1016/j.agee.2017.04.009	Smith et al. 2019
RO	bio.222	Biodiversity	Soil Microbiome Is More Heterogeneous in Organic Than in Conventional Farming System	Lupatini et al.	Frontiers in Microbiology	2017	7		1	13	2064	10.3389/fmicb.2016.02064	Smith et al. 2019
RO	bio.234	Biodiversity	Environmentally friendly management as an intermediate strategy between organic and conventional agriculture to support biodiversity	Marja et al.	Biological conservation	2014	178		146	154		10.1016/j.biocon.2014.08.005	Smith et al. 2019
RO	bio.242	Biodiversity	Effects of agri-environmental and organic rice farming on yield and macrophyte community in Mediterranean paddy fields	Mertinez-Eixarch et al.	Paddy and Water Environment	2017	15	3	457	468		10.1007/s10333-016-0563-x	Smith et al. 2019
RO	bio.259	Biodiversity	Shade tree diversity enhances coffee production and quality in agroforestry systems in the Western Ghats	Nesper et al.	Agriculture, Ecosystems and Environment	2017	247		172	181		10.1016/j.agee.2017.06.024	Smith et al. 2019
RO	bio.263	Biodiversity	Ground arthropod communities in paddy fields during the dry period: Comparison between different farming methods	Ohwaki	Journal of Asia-Pacific Entomology	2015	18		413	419		10.1016/j.aspen.2015.05.001	Smith et al. 2019
OS	bio.271	Biodiversity	Reduction of pesticide use can increase earthworm populations in wheat crops in a European temperate region	Pelosi et al.	Agriculture, Ecosystems and Environment	2013	181		223	230		10.1016/j.agee.2013.10.003	Smith et al. 2019
OS	bio.272	Biodiversity	Analysis of the occurrence and activity of diazotrophic communities in organic and conventional horticultural soils	Perez et al.	Applied soil ecology	2014	79		37	48		10.1016/j.apsoil.2014.03.006	Smith et al. 2019
OS	bio.273	Biodiversity	Comparative Analysis of Prokaryotic Communities Associated with Organic and Conventional Farming Systems	Pershina et al.	PLOS ONE	2015	10	12			e0145072	10.1371/journal.pone.0145072	Smith et al. 2019
OS	bio.280	Biodiversity	Effects of local and landscape factors on spiders and olive fruit flies	Picchi et al.	Agriculture, Ecosystems and Environment	2016	222		138	147		10.1016/j.agee.2016.01.045	Smith et al. 2019
OS	bio.283	Biodiversity	Nematode community structures in different deciduous tree fruits and grape in Colorado, USA and impact of organic peach and apple production practices	Pokharel et al.	European journal of soil biology	2015	67		59	68		10.1016/j.ejsobi.2015.02.003	Smith et al. 2019
OS	bio.295	Biodiversity	Occurrence of root endophytic fungi in organic versus conventional vineyards on the Croatian coast	Radic et al.	Agriculture, ecosystems & environment	2014	192		115	121		10.1016/j.agee.2014.04.008	Smith et al. 2019
OS	bio.301	Biodiversity	Effect of organic, conventional and mixed cultivation practices on soil microbial community structure and nematode abundance in a cultivated onion crop	Reilly et al.	Journal of the Science of Food and Agriculture	2013	93	15	3700	3709		10.1002/jsfa.6206	Smith et al. 2019
OS	bio.302	Biodiversity	Macroinvertebrate communities as bioindicators of water quality in conventional and organic irrigated rice fields in Guanacaste, Costa Rica	Rizo-Patron et al.	Ecological Indicators	2013	29		68	78		10.1016/j.ecolind.2012.12.013	Smith et al. 2019
OS	bio.306	Biodiversity	Long-Term Management Affects the Community Composition of Arable Soil Seedbanks	Rotches-Ribalta et al.	Weed Science	2016	65	1	73	82		10.1614/WS-D-16-00072.1	Smith et al. 2019
OS	bio.307	Biodiversity	Diet of generalist predators reflects effects of cropping period and farming system on extra- and intraguild prey	Roubinet et al.	Ecological Applications	2017	27	4	1167	1177		10.1002/eap.1510	Smith et al. 2019
OS	bio.313	Biodiversity	Diversity and abundance of Phytoseiidae (Acari: Mesostigmata) in three crop management strategies of citrus orchards in Tunisia	Sahraoui et al.	Acarologia	2014	54	2	155	169		10.1051/acarologia/20142123	Smith et al. 2019
OS	bio.328	Biodiversity	Diversity of wasps (Hymenoptera: Vespidae) in conventional and organic guarana (Paullinia cupana var. sorbilis) crops in the Brazilian Amazon	Somavilla et al.	Sociobiology	2016	63	4	1051	1057		10.13102/sociobiology.v63i4.1178	Smith et al. 2019
OS	bio.331	Biodiversity	Long-term impact of farm management and crops on soil microorganisms assessed by combined DGGE and PLFA analyses.	Stagnari et al	Frontiers in microbiology	2015	5		1	8		10.3389/fmicb.2014.00644	Smith et al. 2019
OS	bio.335	Biodiversity	Ecosystem services along a management gradient in Michigan (USA) cropping systems	Syswerda & Robertson	Agriculture, ecosystems & environment	2014	189		28	35		10.1016/j.agee.2014.03.006	Smith et al. 2019
OS	bio.340	Biodiversity	Bat activity in rice paddies: Organic and conventional farms compared to unmanaged habitat	Toffoli & Rughetti	Agriculture, Ecosystems and Environment	2017	249		123	129		10.1016/j.agee.2017.08.022	Smith et al. 2019
OS	bio.348	Biodiversity	Decrease in diversity and changes in community composition of arbuscular mycorrhizal fungi in roots of apple trees with increasing orchard management intensity across a regional scale.	Van Geel et al.	Molecular ecology	2015	24	4	941	952		10.1111/mec.13079	Smith et al. 2019
OS	bio.349	Biodiversity	High soil phosphorus levels overrule the potential benefits of organic farming on arbuscular mycorrhizal diversity in northern vineyards	Van Geel et al.	Agriculture, Ecosystems and Environment	2017	248		144	152		10.1016/j.agee.2017.07.017	Smith et al. 2019
OS	bio.350	Biodiversity	Bacterial communities in the rhizosphere of Vitis vinifera L. cultivated under distinct agricultural practices in Argentina.	Vega-Avila et al.	Antonie van Leeuwenhoek	2015	107	2	575	588		10.1007/s10482-014-0353-7	Smith et al. 2019
OS	bio.351	Biodiversity	Impact of Organic and Conventional Systems of Coffee Farming on Soil Properties and Culturable Microbial Diversity	Velmourougane	Scientifica	2016	2016		1	9	3604026	10.1155/2016/3604026	Smith et al. 2019
OS	bio.360	Biodiversity	Long-term no-tillage and organic input management enhanced the diversity and stability of soil microbial community	Wang et al.	Science of the Total Environment	2017	609		341	347		10.1016/j.scitotenv.2017.07.053	Smith et al. 2019
JMT	bio.2	Biodiversity	Quantifying the effect of organic farming, field boundary type and landscape structure on the vegetation of field boundaries	Aavik & Liira	Agriculture, ecosystems & environment	2010	135		178	186			Tuck et al. 2014
JMT	bio.14	Biodiversity	Vegetation diversity of conventional and organic hedgerows in Denmark	Aude et al.	Agriculture, ecosystems & environment	2003	99		135	147			Tuck et al. 2014
JMT	bio.35	Biodiversity	Earthworm populations and association with soil parameters in organic and conventional ley pastures	Bithell et al.	Biological Agriculture & Horticulture	2005	23		143	159			Tuck et al. 2014
JMT	bio.42	Biodiversity	Plant diversity in crop fields and woody hedgerows of organic and conventional farms in contrasting landscapes	Boutin et al.	Agriculture, ecosystems & environment	2008	123		185	193			Tuck et al. 2014
JMT	bio.43	Biodiversity	The Value of Woody Hedgerows for Moth Diversity on Organic and Conventional Farms	Boutin et al.	Environmental Entomology	2011	40		560	569			Tuck et al. 2014
JMT	bio.44	Biodiversity	Arthropod diversity as affected by agricultural management (organic and conventional farming), plant species, and landscape context	Boutin et al.	Ecoscience	2009	16		492	501			Tuck et al. 2014
JMT	bio.47	Biodiversity	Organic farming in isolated landscapes does not benefit flower-visiting insects and pollination	Brittain et al.	Biological Conservation	2010	143		1860	1867			Tuck et al. 2014; Smith et al. 2018
JMT	bio.51	Biodiversity	A functional approach to assessing plant-arthropod interaction in winter wheat	Caballero-Lopez et al.	Agriculture, ecosystems & environment	2010	137		288	293			Tuck et al. 2014
JMT	bio.68	Biodiversity	A comparative study of bird faunas in conventionally and organically farmed areas.	Christensen et al.	Dansk Ornithologisk Forenings Tidskrift,	1996	90		21	28			Crowder et al. 2012; Tuck et al. 2014
JMT	bio.72	Biodiversity	Local and landscape factors in differently managed arable fields affect the insect herbivore community of a non-crop plant species	Clough et al.	Journal of Applied Ecology	2007a	44		22	28			Litchenberg et al. 2017; Tuck et al. 2014
JMT	bio.79	Biodiversity	Organic agriculture promotes evenness and natural pest control	Crowder et al.	Nature	2010	466		109	112			Tuck et al. 2014
JMT	bio.89	Biodiversity	Soil microarthropod community structure and dynamics in organic and conventionally managed apple orchards in Western Colorado	Doles et al.	Applied Soil Ecology	2001	18		83	96			Crowder et al. 2012; Tuck et al. 2014
MJ	bio.92	Biodiversity	Biotic indicators of carabid species richness on organically and conventionally managed arable fields	Döring et al.	Agriculture, ecosystems & environment	2003	98		133	139		10.1016/S0167-8809(03)00075-6	Tuck et al. 2014
MJ	bio.96	Biodiversity	Ground Beetle Abundance In Organic and Conventional Corn Fields	Dritschilo & Wanner	Environmental Entomology	1980	9		629	631			Tuck et al. 2014
MJ	bio.101	Biodiversity	Role of organic and conventional field boundaries on boreal bumblebees and butterflies	Ekroos et al.	Agriculture, ecosystems & environment	2008	124		155	159		10.1016/j.agee.2007.09.003	Tuck et al. 2014
MJ	bio.106	Biodiversity	A comparison of butterfly populations on organically and conventionally managed farmland.	Feber et al.	Journal of Zoology	2007	273		30	39		10.1111/j.1469-7998.2007.00296.x	Crowder et al. 2012; Tuck et al. 2014
MJ	bio.110	Biodiversity	Mixed effects of landscape structure and farming practice on bird diversity	Fischer et al.	Agriculture, ecosystems & environment	2011a	141		119	125		10.1016/j.agee.2011.02.021	Crowder et al. 2012; Tuck et al. 2014
MJ	bio.111	Biodiversity	Small mammals in agricultural landscapes: Opposing responses to farming practices and landscape complexity.	Fischer et al.	Biological Conservation	2011b	144		1130	1136		10.1016/j.biocon.2010.12.032	Tuck et al. 2014
MJ	bio.112	Biodiversity	Does soil biota benefit from organic farming in complex vs. simple landscapes?	Flohre et al.	Agriculture, ecosystems & environment	2011	141		210	214		10.1016/j.agee.2011.02.032	Tuck et al. 2014
MJ	bio.113	Biodiversity	Avian nesting success and diversity in conventionally and organically managed apple orchards	Fluetsch & Sparling	Environmental Toxicology and Chemistry	1994	13		1651	1659			Crowder et al. 2012; Tuck et al. 2014
MJ	bio.114	Biodiversity	Protozoa as bioindicators in agroecosystems, with emphasis on farming practices, biocides, and biodiversity.	Foissner	Agriculture, ecosystems & environment	1997	62		93	103			Tuck et al. 2014
MJ	bio.120	Biodiversity	Scale matters: the impact of organic farming on biodiversity at different spatial scales.	Gabriel et al.	Ecology Letters	2010	13		858	869		10.1111/j.1461-0248.2010.01481.x	Tuck et al. 2014
MJ	bio.119	Biodiversity	Insect pollinated plants benefit from organic farming	Gabriel & Tscharntke	Agriculture, ecosystems & environment	2007	118		43	48		10.1016/j.agee.2006.04.005	Tuck et al. 2014
MJ	bio.126	Biodiversity	Molecular diversity of arbuscular mycorrhizal fungi in onion roots from organic and conventional farming systems in the Netherlands	Galván et al.	Mycorrhiza	2009	19		317	328			Tuck et al. 2014
MJ	bio.132	Biodiversity	Organic and integrated agriculture: the effects on bird communities in orchard farms in northern Italy	Genghini et al.	Biodiveristy and Conservation	2006	15		3077	3094			Tuck et al. 2014
MJ	bio.154	Biodiversity	Arable plant communities as indicators of farming practice.	Hawes et al.	Agriculture, ecosystems & environment	2010	138		17	26			Tuck et al. 2014
MJ	bio.161	Biodiversity	Agricultural landscapes with organic crops support higher pollinator diversity	Holzschuh et al.	Oikos	2008	117		354	361			Tuck et al. 2014
MJ	bio.162	Biodiversity	How do landscape composition and configuration, organic farming and fallow strips affect the diversity of bees, wasps and their parasitoids?	Holzschuh et al.	Journal of Animal Ecology	2010	79		491	500		10.1111/j.1365-2656.2009.01642.x	Tuck et al. 2014
MJ	bio.164	Biodiversity	The effects of the intensification of agriculture on northern temperate dung beetle communities.	Hutton & Giller	Journal of Applied Ecology	2003	40		994	1007			Crowder et al. 2012; Tuck et al. 2014
MJ	bio.165	Biodiversity	Weed species diversity and community composition in organic and conventional cropping of spring cereals	Hyvonen et al.	Agriculture Ecosystems & Environment,	2003	97		131	149		10.1016/S0167-8809(03)00117-8	Crowder et al. 2012; Tuck et al. 2014
MJ	bio.169	Biodiversity	The spatial and temporal pattern of carabid beetles on arable fields in northern Germany (Schleswig-Holstein) and their value as ecological indicators	Irmler	Agriculture, ecosystems & environment	2003	98		141	151			Tuck et al. 2014
MJ	bio.178	Biodiversity	Assessing the effect of the time since transition to organic farming on plants and butterflies.	Jonason et al.	Journal of Applied Ecology	2011	48		543	550		10.1111/j.1365-2664.2011.01989.x	Tuck et al. 2014
RO	bio.184	Biodiversity	Weed seedbanks in arable fields: effects of management practices and surrounding landscape.	Jose-Maria & Sans	Weed Research	2011	51		631	640			Tuck et al. 2014
RO	bio.201	Biodiversity	Carabid beetle communities (Carabidae, Coleoptera) in biologically and conventionally farmed agroecosystems	Kromp	Agriculture, Ecosystems, and Environment	1989	27	1 to 4	241	251		10.1016/0167-8809(89)90089-3	Tuck et al. 2014
RO	bio.202	Biodiversity	Carabid beetles (Coleoptera, Carabidae) as bioindicators in biological and conventional farming in Austrian potato fields	Kromp	Biology and Fertility of Soils	1990	9	2	182	187			Tuck et al. 2014
RO	bio.217	Biodiversity	Bird Use and Nesting in Conventional, Minimum-Tillage, and Organic Cropland	Lokemoen & Beiser	The Journal of Wildlife Management	1997	61	3	644	655		10.2307/3802172	Tuck et al. 2014
RO	bio.230	Biodiversity	Management regimes and farming practices enhancing plant species richness on ditch banks	Manhoudt et al.	Agriculture, Ecosystems, and Environment	2007	119	3 to 4	353	358		10.1016/j.agee.2006.08.004	Tuck et al. 2014
RO	bio.241	Biodiversity	Weed aboveground and seedbank community responses to agricultural management systems	Menalled et al.	Ecological Applications	2001	11	6	1586	1601		10.1890/1051-0761(2001)011[1586:WAASCR]2.0.CO;2	Tuck et al. 2014
RO	bio.251	Biodiversity	A comparison of the flora and arthropod fauna of organically and conventionally grown winter wheat in southern England	Moreby et al.	Annals of Applied Biology	1994	125	1	13	27		10.1111/j.1744-7348.1994.tb04942.x	Crowder et al. 2012; Tuck et al. 2014
OS	bio.270	Biodiversity	Earthworm community in conventional, organic and direct seeding with living mulch cropping systems	Pelosi et al.	Agronomy for Sustainable Agriculture	2009	29	2	287	295		10.1051/agro/2008069	Crowder et al. 2012; Tuck et al. 2014
OS	bio.274	Biodiversity	Effects of organic farming on field boundary vegetation in Denmark	Peterson et al.	Agriculture, Ecosystems, and Environment	2006	113	1 to 4	302	306		10.1016/j.agee.2005.09.016	Tuck et al. 2014
OS	bio.278	Biodiversity	Effects of biodynamic, organic and conventional production systems on earthworm populations.	Pfiffner & Mader	Biological Agriculture & Horticulture	1997	15	1 to 4	2	10		10.1080/01448765.1997.9755177	Tuck et al. 2014; Smith et al. 2018
OS	bio.279	Biodiversity	Effects of bio-dynamic, organic and conventional farming on ground beetles (Col. Carabidae) and other epigaeic arthropods in winter wheat	Pfiffner & Niggli	Biological Agriculture & Horticulture	1996	12	4	353	364		10.1080/01448765.1996.9754758	Tuck et al. 2014; Smith et al. 2018
OS	bio.284	Biodiversity	Using Species-Area Curves to Examine Weed Communities in Organic and Conventional Spring Wheat Systems	Pollnac et al.	Weed Science	2009	57	3	241	247		10.1614/WS-08-159.1	Tuck et al. 2014; Smith et al. 2018
OS	bio.288	Biodiversity	Organic dairy farming: impacts on insect–flower interaction networks and pollination	Power & Stout	Journal of Applied Ecology	2011	48	3	561	569		10.1111/j.1365-2664.2010.01949.x	Tuck et al. 2014; Smith et al. 2018
OS	bio.293	Biodiversity	Landscape context of organic and conventional farms: Influences on carabid beetle diversity	Purtauf et al.	Agriculture, Ecosystems, and Environment	2005	108	2	165	174		10.1016/j.agee.2005.01.005	Crowder et al. 2012; Tuck et al. 2014
OS	bio.298	Biodiversity	The Arthropod Fauna of Organic Versus Conventional Cereal Fields in Denmark	Reddersen	Biological Agriculture & Horticulture	1997	15	1 to 4	61	71		10.1080/01448765.1997.9755182	Crowder et al. 2012; Tuck et al. 2014
OS	bio.308	Biodiversity	Organic farming at local and landscape scales benefits plant diversity.	Rundlof et al.	Ecography	2010	33	3	514	522		10.1111/j.1600-0587.2009.05938.x	Crowder et al. 2012; Tuck et al. 2014
OS	bio.309	Biodiversity	Interacting effects of farming practice and landscape context on bumblebees	Rundlof et al.	Biological Conservation	2008b	141	2	417	426		10.1016/j.biocon.2007.10.011	Tuck et al. 2014
OS	bio.311	Biodiversity	The effect of organic farming on butterfly diversity depends on landscape contex	Rundlof et al.	Journal of Applied Ecology	2006	43	6	1121	1127		10.1111/j.1365-2664.2006.01233.x	Tuck et al. 2014
OS	bio.314	Biodiversity	Weeds in spring cereal fields in Finland – a third survey	Salonen et al.	Agricultural and Food Science in Finland	2001	10	4	347	364			Tuck et al. 2014; Smith et al. 2018
OS	bio.316	Biodiversity	Effects of agricultural management on nematode-mite assemblages: Soil food web indices as predictors of mite community composition	Sanchez-Moreno et al.	Applied Soil Ecology	2009	41	1	107	117		10.1016/j.apsoil.2008.09.004	Tuck et al. 2014; Smith et al. 2018
OS	bio.317	Biodiversity	Differential effects of landscape and management on diversity and density of ground-dwelling farmland spiders	Schmidt et al.	Journal of Applied Ecology	2005	42	2	281	287		10.1111/j.1365-2664.2005.01014.x	Crowder et al. 2012; Tuck et al. 2014
OS	bio.325	Biodiversity	Weed community and corn yield variability in diverse managemnet systems	Smith & Gross	Weed Science	2006	54	1	106	113		10.1614/WS-05-108R.1	Tuck et al. 2014; Smith et al. 2018
OS	bio.324	Biodiversity	Consequences of organic farming and landscape heterogeneity for species richness and abundance of farmland birds	Smith et al.	Oecologia	2010	162	4	1071	1079		10.1007/s00442-010-1588-2	Tuck et al. 2014
OS	bio.339	Biodiversity	Bush, bugs, and birds; interdependency in a farming landscape	Thomas et al.	Open Journal of Ecology	2011	1	2	9	23		10.4236/oje.2011.12002	Tuck et al. 2014
OS	bio.342	Biodiversity	WEED SPECIES DIVERSITY IN THE CZECH REPUBLIC UNDER DIFFERENT FARMING AND SITE CONDITIONS	Tyser et al.	Journal of Plant Diseases and Protection	2015	63	83	291	295		10.11118/actaun201563030741	Tuck et al. 2014; Smith et al. 2018
OS	bio.343	Biodiversity	An on-farm approach to investigate the impact of diversified crop rotations on weed species richness and composition in winter wheat	Ulber et al.	Weed Research	2009	49	5	534	543		10.1111/j.1365-3180.2009.00722.x	Tuck et al. 2014
OS	bio.345	Biodiversity	Spatial scaling of arbuscular mycorrhizal fungal diversity is affected by farming practice	van der Gast et al.	Environmental Microbiology	2010	13	1	241	249		10.1111/j.1462-2920.2010.02326.x	Tuck et al. 2014; Smith et al. 2018
OS	bio.352	Biodiversity	Positive effects of organic farming on below-ground mutualists: large-scale comparison of mycorrhizal fungal communities in agricultural soils	Verbruggen et al.	New Phytologist	2010	186	4	968	979		10.1111/j.1469-8137.2010.03230.x	Tuck et al. 2014; Smith et al. 2018
KC	bio.361	Biodiversity	Species composition in agroecosystems: The effect of landscape, habitat, and farm management	Weibull & Ostman	Basic and Applied Ecology	2003	4	4	349	361		10.1078/1439-1791-00173	Tuck et al. 2014
KC	bio.373	Biodiversity	Increased weed diversity, density and above-ground biomass in long-term organic crop rotations	Wortman et al.	Renewable Agriculture and Food Systems	2010	25	4	281	295		10.1017/S174217051000030X	Tuck et al. 2014; Smith et al. 2018
KC	bio.376	Biodiversity	Faunal and Microbial Diversity in Three Welsh Grassland Soils Under Conventional and Organic Management Regimes	Yeates et al.	Journal of Applied Ecology	1997	34	2	453	470		10.2307/2404890	Tuck et al. 2014
JMT	bio.13	Biodiversity	Carabid beetle (Coleoptera: Carabidae) diversity and abundance in organic potatoes and conventionally grown seed potatoes in the north of Scotland	Armstrong	Pedobiologia	1995	39		231	237			Tuck et al. 2014; Litchenberg et al. 2017
JMT	bio.71	Biodiversity	Organic versus conventional arable farming systems: Functional grouping helps understand staphylinid response.	Clough et al.	Agriculture, ecosystems & environment	2007b	118		285	290			Tuck et al. 2014; Litchenberg et al. 2017; Smith et al. 2018
JMT	bio.73	Biodiversity	Spider diversity in cereal fields: comparing factors at local, landscape and regional scales.	Clough et al.	Journal of Biogeography	2005	32		2007	2014			Tuck et al. 2014; Litchenberg et al. 2017; Smith et al. 2018
JMT	bio.88	Biodiversity	Landscape and management effects on structure and function of soil arthropod communities in winter wheat.	Diekötter et al.	Agriculture, ecosystems & environment	2010	137		108	112			Tuck et al. 2014; Litchenberg et al. 2017
MJ	bio.94	Biodiversity	Fundamental Differences Between Conventional and Organic Tomato Agroecosystems in California	Drinkwater et al.	Ecological Applications	1995	5		1098				Tuck et al. 2014; Litchenberg et al. 2017
MJ	bio.95	Biodiversity	Responses in Abundance and Diversity of Cornfield Carabid Communities to Differences in Farm Practices	Dritschilo & Erwin	Ecology	1982	63		900				Tuck et al. 2014; Litchenberg et al. 2017
MJ	bio.100	Biodiversity	Responses in plant and carabid communities to farming practises in boreal landscapes	Ekroos et al.	Agriculture, ecosystems & environment	2010	135		288	293		10.1016/j.agee.2009.10.007	Tuck et al. 2014; Litchenberg et al. 2017
MJ	bio.105	Biodiversity	The Effects of Organic Farming on Surface-Active Spider (Araneae) Assemblages in Wheat in Southern England, UK.	Feber et al.	Journal of Arachnology	1998	26	2	190	202			Tuck et al. 2014; Litchenberg et al. 2017
MJ	bio.159	Biodiversity	Arthropod Fauna of Conventional and Organic Rice Fields in California	Hesler et al.	Journal of Economic Entomology	1993	86		149	158			Tuck et al. 2014; Litchenberg et al. 2017
MJ	bio.160	Biodiversity	Carabid species and activity densities in biologically and conventionally managed cabbage fields	Hokkanen & Holopainen	Journal of Applied Entomology	1986	102		353	363			Tuck et al. 2014; Litchenberg et al. 2017
MJ	bio.163	Biodiversity	Diversity of flower-visiting bees in cereal fields: effects of farming system, landscape composition and regional context	Holzschuh et al.	Journal of Applied Ecology	2007	44		41	49		10.1111/j.1365-2664.2006.01259.x	Tuck et al. 2014; Litchenberg et al. 2017
RO	bio.198	Biodiversity	Decreased Functional Diversity and Biological Pest Control in Conventional Compared to Organic Crop Fields	Krauss et al.	PLoS ONE	2011a	6						Tuck et al. 2014; Litchenberg et al. 2017
RO	bio.200	Biodiversity	Crop pollination from native bees at risk from agricultural intensification	Kremen et al.	Proceedings of the National Academy of Sciences	2002	99	26	16812	16816		10.1073/pnas.262413599	Tuck et al. 2014; Litchenberg et al. 2017
RO	bio.209	Biodiversity	Comparison of organic and conventional farms: challenging ecologists to make biodiversity functional	Letourneau & Bothwell	Frontiers in Ecology and Environment	2008	6		430	438		10.1890/070081	Tuck et al. 2014; Litchenberg et al. 2017
RO	bio.225	Biodiversity	Do differences in food web structure between organic and conventional farms affect the ecosystem service of pest control?	Macfadyen et al.	Ecology Letters	2009a	12	3	229	238		10.1111/j.1461-0248.2008.01279.x	Tuck et al. 2014; Litchenberg et al. 2017
RO	bio.260	Biodiversity	Diversity of spiders after spring sowing – influence of farming system and habitat type	Oberg	Journal of Applied Entomology	2007	131	8	524	531		10.1111/j.1439-0418.2007.01173.x	Tuck et al. 2014; Litchenberg et al. 2017
OS	bio.285	Biodiversity	Effects of organic farming on plant and arthropod communities: A case study in Mediterranean dryland cereal	Ponce et al.	Agriculture, Ecosystems, and Environment	2011	141	1 to 2	193	201		10.1016/j.agee.2011.02.030	Tuck et al. 2014; Litchenberg et al. 2017
OS	bio.355	Biodiversity	Effects of conversion to organic farming on carabid beetles (Carabidae) in experimental fields in the Czech Republic	Vesely & Sarapatka	Biological Agriculture & Horticulture	2008	25	4	289	309		10.1080/01448765.2008.9755057	Tuck et al. 2014; Litchenberg et al. 2017
KC	bio.362	Biodiversity	Diversity of butterflies in the agricultural landscape: the role of farming system and landscape heterogeneity	Weibull et al.	Ecography	2000	23	6	743	750		10.1111/j.1600-0587.2000.tb00317.x	Crowder et al. 2012; Tuck et al. 2014; Litchenberg et al. 2017
KC	bio.372	Biodiversity	Mixed effects of organic farming and landscape complexity on farmland biodiversity and biological control potential across Europe	Winqvist et al.	Jounral of Applied Ecology	2011	48	3	570	579		10.1111/j.1365-2664.2010.01950.x	Tuck et al. 2014; Litchenberg et al. 2017
OS	bio.347	Biodiversity	Effects of organic versus conventional management on chemical and biological parameters in agricultural soils	Van Diepeningen et al.	Applied Soil Ecology	2006	31	1 to 2	120	135		10.1016/j.apsoil.2005.03.003	Tuck et al. 2014; Lori et al. 2017
KC	profit.12	Profit	An economic comparison of organic and conventional grain crops in a long-term agroecological research (LTAR) site in Iowa	Delate et al.	American Journal of Alternative Agriculture	2003	18	2	59	69			Crowder and Reganold 2015
KC	profit.13	Profit	Economic Performance of Long-Term Organic and Conventional Cropping Systems in Minnesota	Delbridge et al.	Agronomy Journal	2011	103		1372	1382		10.2134/agronj2011.0371	Crowder and Reganold 2015
KC	profit.14	Profit	Economics of organic and conventional hazelnut production in the Terme district of Samsun, Turkey	Demiryurek & Ceyhan	Renewable Agriculture and Food Systems	2008	23	3	217	227		10.1017/S1742170508002251	Crowder and Reganold 2015
KC	profit.15	Profit	The viability of cotton-based organic farming systems in India	Eyhorn et al.	Earthscan	2007	5	1	25	NA			Crowder and Reganold 2015
KC	profit.17	Profit	Yield and Economic Performance of Organic and Conventional Cotton-Based Farming Systems – Results from a Field Trial in India	Forster et al.	PLoS ONE	2013	8	12	e81039	NA		10.1371/journal.pone.0081039	Crowder and Reganold 2015
KC	profit.2	Profit	Crop Productivity and Economics during the Transition to Alternative Cropping Systems	Archer et al.	Agronomy Journal	2007	99		1538	1547		10.2134/agronj2006.0364	Crowder and Reganold 2015
KC	profit.20	Profit	Organic Dried Fig Production: A Comparitive Analysis of Organic and Conventional Smallholdings in Turkey	Gundogmas	Biological Agriculture and Horticulture	2006	24		379	396			Crowder and Reganold 2015
KC	profit.21	Profit	A comparitive Analysis of Organic and Conventional Dried Apricot Production on Small Households in Turkey	Gundogmas	Asian Journal of Plant Sciences	2007	5	1	98	104			Crowder and Reganold 2015
KC	profit.22	Profit	Economic analysis of experimental organic agricultural systems on a highly eroded soil of the Georgia Piedmont, USA	Jacobsen et al.	Renewable Agriculture and Food Systems	2010	25	4	296	308			Crowder and Reganold 2015
KC	profit.23	Profit	Economics of organically managed and conventional potato production systems in Atlantic Canada	Khakbazan et al.	Canadian Journal of Plant Science	2015	95	1	161	174		10.4141/cjps-2014-050	Crowder and Reganold 2015
KC	profit.25	Profit	Comparison of energy consumption and economic performance of organic and conventional soybean production — A case study from Jilin Province, China	Li-wei et al.	Journal of Integrative Agriculture	2015	14	8	1561	1572		10.1016/S2095-3119(15)61131-5	Crowder and Reganold 2015
KC	profit.28	Profit	Profitability of organic cropping systems in southwestern Minnesota	Mahoney et al.	Renewable Agriculture and Food Systems	2003	19	1	35	46			Crowder and Reganold 2015
KC	profit.29	Profit	The profitability of organic soybean production	McBride & Greene	Renewable Agriculture and Food Systems	2009	24	4	276	284			Crowder and Reganold 2015
KC	profit.3	Profit	Potential and limitations of organic and fair trade cotton for improving livelihoods of smallholders: evidence from Central Asia	Bachmann	Renewable Agriculture and Food Systems	2011	27	2	138	147		10.1017/S1742170511000202	Crowder and Reganold 2015
KC	profit.30	Profit	Evaluating the benefits of organic farming in rice agroecosystems in the Philippines	Mendoza	Journal of Sustainable Agriculture	2004	24		93	115		10.1300/J064v24n02_09	Crowder and Reganold 2015
KC	profit.35	Profit	Economic return in production of lettuce and cantaloupe is affected by practice	Ogbuchiekwe et al.	HortScience	2004	39	4	1321	1325			Crowder and Reganold 2015
KC	profit.37	Profit	An Economic Evaluation on Organic Cherry Production: A Case of Turkey	Olgun et al.	Journal of Sustainable Agriculture	2006	28	2	117	130			Crowder and Reganold 2015
KC	profit.39	Profit	Profitability of leek (Allium porrum L.) in three production systems	Oplanic et al.	Journal of Food, Agriculture and Environment	2009	7	3&4	376	381			Crowder and Reganold 2015
KC	profit.4	Profit	Organic and Conventional Wheat Production: Examination of Energy and Economics	Berardi et al.	Agro-Ecosystems	1978	4		367	376			Crowder and Reganold 2015
KC	profit.40	Profit	ECONOMIC EVALUATION OF CEREAL CROPPING SYSTEMS UNDER SEMIARID CONDITIONS: MINIMUM INPUT, ORGANIC AND CONVENTIONAL	Pardo et al.	Scientific Agriculture	2009	66	5	615	621			Crowder and Reganold 2015
KC	profit.43	Profit	The effect of organic farming practices on growth, yeild, and quality of rose onion (Allium sepa)	Prabhaker et al.	The Indian Journal of Agriculture	2012	82	6	500	503			Crowder and Reganold 2015
KC	profit.46	Profit	Organic rice (Oryza sativa) and wheat (Triticum aestivum) production, quality and economics in irrigated agriculture	Rani et al.	The Indian Journal of Agriculture	2009	79	1	20	24			Crowder and Reganold 2015
KC	profit.47	Profit	Sustainability of three apple production systems	Reganold et al.	Nature	2001	410		926	930			Crowder and Reganold 2015
KC	profit.48	Profit	Frequency of Manure Application in Organic versus Annual Application of Synthetic Fertilizer in Conventional Vegetable Production	Russo & Taylor	Horticultural Science	2010	45	11	1673	1680			Crowder and Reganold 2015
KC	profit.5	Profit	Comparative Cost Analyses of Conventional, Integrated Crop Management, and Organic Methods	Brumfield et al.	Hort-Technology	2000	10	4	785	793			Crowder and Reganold 2015
KC	profit.50	Profit	A comparison of financial returns during early transition to organic vegetable production	Sellen et al.	Journal of Vegetable Crop Production	1996	1	2	11	39			Crowder and Reganold 2015
KC	profit.52	Profit	Initial technical and economic comparisons of different farming systems in Ontario, Canada	Stonehouse et al.	Biological Agriculture and Horticulture	2012	13		371	386			Crowder and Reganold 2015
KC	profit.53	Profit	Higher yield, profit and soil quality from organic farming of elephant foot yam	Suja et al.	Agronomic Sustainable Development	1994	32		755	764		10.1007/s13593-011-0058-5	Crowder and Reganold 2015
KC	profit.54	Profit	Granny Smith conversions to organic show early success	Swezey et al.	California Agriculture	2008	48	6	36	44			Crowder and Reganold 2015
KC	profit.55	Profit	A comparison of energy use in organic and conventional tomato production	Turhan et al.	Journal of Food, Agriculture and Environment	2011	6	3&4	318	321			Crowder and Reganold 2015
KC	profit.57	Profit	Fair Trade organic coffee production in Nicaragua- Sustainable development or a poverty trap?	Valkila	Ecological Economics	2009	68	12	3018	3025		10.1016/j.ecolecon.2009.07.002	Crowder and Reganold 2015
KC	profit.7	Profit	Long-term economic performance of organic and conventional field crops in the mid-Atlantic region	Cavigelli et al.	Renewable Agriculture and Food Systems	2009	24	2	102	191		10.1017/S1742170509002555	Crowder and Reganold 2015
KC	profit.8	Profit	Crop yeilds and economic comparisons of organic, low-input, and conventional farming systems in the California's Sacramento Valley	Clark et al.	American Journal of Alternative Agriculture	1999	14	3	109	121			Crowder and Reganold 2015
KC	profit.9	Profit	A Comparison of Four Processing Tomato Production Systems Differing in Cover Crop and Chemical Inputs	Creamer et al.	Journal of the American Society of Horticultural Science	2006	121	3	559	568			Crowder and Reganold 2015
AC	yield.101	Yield	An economic analysis of alternative cropping systems for east-central Nebraska	Helmers et al.	American Journal of Alternative Agriculture	1986	23	4	317	326			Ponisio et al. 2015
AC	yield.103	Yield	Comparison between organic and mineral fertilization for soil fertility levels, crop macronutrient concentrations, and yield	Herencia et al.	Agronomy Journal 99, 973-983	2007	21	7	1029	1043		10.1007/s11027-013-9535-2	Ponisio et al. 2015
KC	yield.11	Yield	Sensory, yield and quality differences between organically and conventionally grown winter wheat	Arncken et al.	Journal of Science Food Agriculture	2012	11	1	155	163		10.5424/sjar/2013111-3282	Ponisio et al. 2015
JHT	yield.115	Yield	The effect of cultivation methods on the yield and biological quality of potato	Jarvan & Edesi	Agronomy Research 7(Special Issue I), 289-299	2009	7	SI	289	299			Ponisio et al. 2015
JHT	yield.117	Yield	Organic banana production in Ecuador: Its implications on black Sigatoka development and plant-soil nutritional status	Jimenez et al.	Renewable Agriculture and Food Systems 22(4), 297-306	2007	22	4	297	306		10.1017/S1742170507001895	Ponisio et al. 2015
JHT	yield.118	Yield	Plant vigour and yields of organically and conventionally grown tomato crops in taiwan	Juroszek et al.	Acta Horticulturae	2008	767		257	265		10.17660/ActaHortic.2008.767.27	Ponisio et al. 2015
JHT	yield.119	Yield	The influence of organic and conventional crop management, variety and year on the yield and flavonoid level in common buckwheat groats	Kalinova et al.	Food Chemistry	2011	127	2	602	608		10.1016/j.foodchem.2011.01.050	Ponisio et al. 2015
JHT	yield.123	Yield	Performance and stability of performance of spring wheat variety mixtures in organic and conventional management systems in western canada	Kaut et al.	Journal of Agricultural Science 147, 141-153	2009	147		141	153		10.1017/S0021859608008319	Ponisio et al. 2015
JHT	yield.126	Yield	Comparison of long-term organic and conventional crop-livestock systems on a previously nutrient-depleted soil in Sweden	Kirchmann et al.	Agronomy Journal 99, 960-972	2007	99	4	960	972		10.2134/agronj2006.0061	Ponisio et al. 2015
JHT	yield.127	Yield	Comparing wheat grown in South Australian organic and conventional farming systems	Kitchen et al.	Australian Journal of Agriculture 54, 889-901	2003	54	9	889	901		10.1071/AR03039	Ponisio et al. 2015
JHT	yield.132	Yield	Environmental assessment of organic soybean (Glycine max.) imported from China to Denmark: a case study	Knudsen et al.	Journal of Cleaner Production	2010	18	14	1431	1439		10.1016/j.jclepro.2010.05.022	Ponisio et al. 2015
JHT	yield.138	Yield	N,P, and K Budgets and changes in selected topsoil nutrients over 10 years in a long-term experiment with conventional and organic crop rotations	Korsaeth et al.	Applied and Environmental Soil Science	2012	NA			NA	539582	10.1155/2012/539582	Ponisio et al. 2015
JHT	yield.145	Yield	Crop production during conversion from conventional to low-input methods	Liebhardt et al.	Agronomy Journal	1989	81		150	159			Ponisio et al. 2015
JHT	yield.151	Yield	Maize yields and soil nutrients levels with and without pesticides and standard commercial fertilizers	Lockeretz et al.	Agronomy Journal	1980	72	1	65	72		10.2134/agronj1980.00021962007200010014x	Ponisio et al. 2015
JHT	yield.156	Yield	The performance of organic and conventional cropping systems in an extreme climate year	Lotter et al.	American Journal of Alternative Agriculture	2003	18	3	146	154		10.1079/AJAA200345	Ponisio et al. 2015
JHT	yield.159	Yield	Productivity and profitability of multistrata organic versus conventional coffee farms in Costa Rica	Lyngbaek et al.	Agroforestry Systems	2001	53		205	213			Ponisio et al. 2015
JHT	yield.160	Yield	Yield, quality and nutritional status of organically and conventionally-grown strawberry cultivars	Macit et al.	Asian Journal of Plant Sciences	2007	6	7	1131	1136			Ponisio et al. 2015
JHT	yield.161	Yield	Soil fertility and biodiversity in organic farming	Mader et al.	Science	2002	296	5573	1694	1697		10.1126/science.1071148	Ponisio et al. 2015
JHT	yield.162	Yield	Potato yield and metabolic profiling under conventional and organic farming	Maggio et al.	European Journal of Agronomy	2008	28	2	343	350		10.1016/j.eja.2007.10.003	Ponisio et al. 2015
JHT	yield.164	Yield	Influence of Organic and Conventional Management on Yield and Composition of Grape cv. ___Grignolino___	Malusa et al.	Acta Horticulturae	2004	NA		135	141			Ponisio et al. 2015
JHT	yield.169	Yield	Yield increases during the organic transition: improving soil quality or increasing experience?	Martini et al.	Field Crops Research	2004	86	2	255	266		10.1016/j.fcr.2003.09.002	Ponisio et al. 2015
AC	yield.17	Yield	Crop management systems and endomycorrhiza effects on endive (Cichorium endivia L.) growth	Ban et al.	Acta agriculturae Slovenica	2007	NA			NA			Ponisio et al. 2015
JHT	yield.173	Yield	Sunflower under conventional and organic farming systems : results from a long term experiment in Central Italy	Mazzoncini et al.	Aspects of Applied Biology	2006	79		125	129			Ponisio et al. 2015
JHT	yield.174	Yield	Organic vs conventional winter wheat quality and organoleptic bread test	Mazzoncini et al.	3rd QLIF Congress, Hohenheim, Germany (http://orgprints.org/9753/)	2007	NA			NA			Ponisio et al. 2015
AC	yield.19	Yield	Effects of Fertilizers on Yield, Sustainability, and Soil Fertility under Rainfed Pigeon pea + Rice System in Subhumid Oxisol Soils	Behera et al.	Communications in Soil Science and Plant Analysis	2012	NA			NA			Ponisio et al. 2015
Rob	yield.198	Yield	Integrated and Organic Fruit Production Systems for _Liberty Apple in the Northeast United States: A Systems-based Evaluation	Peck et al.	HortScience	2010	NA			NA			Ponisio et al. 2015
Rob	yield.201	Yield	Effects of organic and conventional production systems on quality and nutritional parameters of processing tomatoes	Pieper & Barrett	Journal of the Science of Food and Agriculture 89, 177-194	2009	NA			NA			Ponisio et al. 2015
Rob	yield.202	Yield	Yield and quality criteria in organically and conventionally grown tomatoes in Turkey	Polat et al.	Sci. Agric.	2010	NA			NA			Ponisio et al. 2015
Rob	yield.204	Yield	Organic and other management strategies with two- and four-year crop rotations in Minnesota	Porter et al.	Agronomy Journal 95(2), 233-244	2003	NA			NA			Ponisio et al. 2015
Rob	yield.205	Yield	Grain mineral concentrations and yield of wheat grown under organic and conventional management	Posner et al.	WICST 10th Technical Report (http://wicst.wisc.edu/wp-content/uploads/wicst-yields-yield-variability-and-yield-trends-1990-20021.pdf)	2005	NA			NA			Ponisio et al. 2015
Rob	yield.208	Yield	Organic and Conventional Peach Production and Economics	Rader et al.	Biological Agriculture and Horticulture	1985	NA			NA			Ponisio et al. 2015
Rob	yield.210	Yield	Quality of plant products grown with manure fertilization	Raupp	In Raupp (ed): Quality of plant product grown with manure fertilization. Publications of the Institute for Biodynamic Research, Vol. 9, Darmstadt, pp. 13-33	1996	NA			NA			Ponisio et al. 2015
Rob	yield.214	Yield	Sustainability of three apple production systems	Reganold et al.	Nature 410, 926-930	2001	NA			NA			Ponisio et al. 2015
Rob	yield.218	Yield	Effect of conventional and organic production systems on the yield and quality of field tomato cultivars grown in Tunisia	Riahi et al.	Journal of the Science of Food and Agriculture 89, 2275-2282	2009	NA			NA			Ponisio et al. 2015
Rob	yield.223	Yield	Weed___crop competition relationships differ between organic and conventional cropping systems	Ryan et al.	Weed Research	2009	NA			NA			Ponisio et al. 2015
Rob	yield.230	Yield	A comparison of financial returns during early transition from conventional to organic vegetable production	Sellen et al.	Journal of Vegetable Crop Production 1(2), 11-39	1996	NA			NA			Ponisio et al. 2015
Rob	yield.239	Yield	Yield, fruit quality, and nitrogen uptake of organic and convenitional muskmellon	Song et al.	Journal of Plant Nutrition	2010	NA			NA			Ponisio et al. 2015
Rob	yield.248	Yield	Higher yield, profit and soil quality from organic farming of elephant foot yam	Suja et al.	Agron. Sustain. Dev.	2012	NA			NA			Ponisio et al. 2015
Rob	yield.251	Yield	Six-year comparison between organic, IPM and conventional cotton production systems in the northern San Joaquin Valley, California	Swezey et al.	Renewable Agriculture and Food Systems 22(1), 30-40	2007	NA			NA			Ponisio et al. 2015
Rob	yield.252	Yield	Yielding and Fruit Quality of Three Sweet Pepper Cultivars from Organic and Conventional Cultivation	Szafirowska et al.	Vegetable Crops Research Bulletin	2008	NA			NA			Ponisio et al. 2015
Rob	yield.253	Yield	Spring serals performance in organic and conventional cultivation	Tamm et al.	Agronomy Research	2009	NA			NA			Ponisio et al. 2015
Rob	yield.257	Yield	Potential long-term benefits of no-tillage and organic cropping systems for grain production and soil improvement	Teasdale et al.	Agronomy Journal 99, 1297-1305	2007	NA			NA			Ponisio et al. 2015
Rob	yield.260	Yield	An interdisciplinary, experiment station_based participatory comparison of alternative crop management systems for California's Sacramento Valley	Temple et al.	American Journal of Alternative Agriculture	1994	NA			NA			Ponisio et al. 2015
Rob	yield.261	Yield	Nutrient use efficiencies and leaching of organic and conventional cropping systems in Sweden	Torstensson et al.	Agronomy Journal 98, 603-615	2006							Ponisio et al. 2015
Rob	yield.263	Yield	Crop yield, root growth, and nutrient dynamics in a conventional and three organic cropping systems with different levels of external inputs and N re-cycling through fertility building crops	Thorup-Kristensen et al.	European Journal of Agronomy	2012	NA			NA			Ponisio et al. 2015
Rob	yield.266	Yield	Nutrient use efficiencies and leaching of organic and conventional cropping systems in Sweden	Torstensson et al.	Agronomy Journal 98, 603-615	2006	NA			NA			Ponisio et al. 2015
Rob	yield.268	Yield	Nutrient Management with Cover Crops and Compost Affects Development and Yield in Organically Managed Sweetpotato Systems	Treadwell et al.	HortScience	2008	NA			NA			Ponisio et al. 2015
AC	yield.27	Yield	Ecological apple production: a comparison of organic and integrated apple-growing	Bertschinger et al.	Acta Horticulturae 638, 321-332	2004	NA			NA			Ponisio et al. 2015
Rob	yield.275	Yield	Summer cover crop and in-season management system affect growth and yield of lettuce and cantaloupe	Wang et al.	HortScience 43(5), 1398-1403	2008	NA			NA			Ponisio et al. 2015
Rob	yield.276	Yield	Yield, vitamin and mineral contents of organically and conventionally grown potatoes and sweet corn	Warman & Havard	Agriculture, Ecosystems and Environment 68, 207-216	1998	NA			NA			Ponisio et al. 2015
Rob	yield.278	Yield	High yielding organic crop management decreases plant-available but not recalcitrant soil phosphorus	Welsh et al.	Agronomy Journal 101, 1027-1035	2009	NA			NA			Ponisio et al. 2015
Rob	yield.279	Yield	Going organic in viticulture: a case-study comparison in Clare Valley, South Australia	Wheeler & Crisp	Australasian Journal of Environmental Management	2011	NA			NA			Ponisio et al. 2015
AC	yield.28	Yield	DOK-Versuch: vergleichende Langzeituntersuchungen in den drei Anbausystemen biologisch-dynamisch, organisch-biologisch und konventionell. II. Ertrag der Kulturen: Gerste, 1. und 2. Fruchtfolgeperiode	Besson et al.	Schweiz. Landw. Fo. 32(1), 3-32	1992	NA			NA			Ponisio et al. 2015
AC	yield.29	Yield	DOK-Versuch: vergleichende Langzeituntersuchungen in den drei Anbausystemen biologisch-dynamisch, organisch-biologisch und konventionell. II. Ertrag der Kulturen: Weisskohl, 1. Fruchtfolgeperiode	Besson et al.	Schweiz. Landw. Fo. 32(1/2), 199-218	1993a	NA			NA			Ponisio et al. 2015
AC	yield.30	Yield	DOK-Versuch: vergleichende Langzeituntersuchungen in den drei Anbausystemen biologisch-dynamisch, organisch-biologisch und konventionell. II. Ertrag der Kulturen: Randen, 2. Fruchtfolgeperiode	Besson et al.	Schweiz. Landw. Fo. 32(4), 449-463	1993b	NA			NA			Ponisio et al. 2015
AC	yield.31	Yield	Organic and conventional tomato cropping systems	Bettiol et al.	Scientia Agricola	2004	NA			NA			Ponisio et al. 2015
AC	yield.32	Yield	The effect of growth structure on organic winter wheat quality	Bicanova et al.	Agriculture	2006	NA			NA			Ponisio et al. 2015
AC	yield.35	Yield	Yield, boll distribution and fibre quality of hybrid cotton (Gossypium hirsutum L.) as influenced by organic and modern methods of cultivation	Blaise	Journal of Agronomy and Crop Science 192, 248-256	2006	NA			NA			Ponisio et al. 2015
AC	yield.38	Yield	Crop Production and Environmental Effects in Conventional and Organic Vegetable Farming Systems: The Case of a Long-Term Experiment in Mediterranean Conditions (Central Italy)	Campanelli et al.	Journal of Sustainable Agriculture	2012	NA			NA			Ponisio et al. 2015
AC	yield.42	Yield	Long-term economic performance of organic and conventional field crops in the mid-atlantic region	Cavigelli et al.	Renewable Agriculture and Food Systems 24(2), 102-119	2009	NA			NA			Ponisio et al. 2015
AC	yield.47	Yield	Effects of conventional and organic fertilization on spinach (Spinacea oleracea L.) growth, yield, vitamin C and nitrate concentration during two succssive seasons	Citak & Sonmez	Scientia Horticulturae 126, 415-420	2010	NA			NA			Ponisio et al. 2015
AC	yield.48	Yield	Crop-yield and economic comparisons of organic, low-input, and conventional farming systems in California's Sacramento valley	Clark et al.	American Journal of Alternative Agriculture 14(3), 109-121	1999a	NA			NA			Ponisio et al. 2015
AC	yield.52	Yield	Agronomic Performance of Cropping Systems with Contrasting Crop Rotations and External Inputs	Coulter et al.	Agronomy Journal	2011	NA			NA			Ponisio et al. 2015
AC	yield.56	Yield	Yield and fruit quality of watermelon and melon under protected organic and conventional farming systems in a Mediterranean region of Turkey	Curuk et al.	Biological Agriculture and Horticulture	2004	NA			NA			Ponisio et al. 2015
AC	yield.58	Yield	The Effect of Organic Fertilization on Yields of Tomato Crops in the Sele River Plain	De Luca et al.	Acta Horticulturae	2012	NA			NA			Ponisio et al. 2015
AC	yield.59	Yield	Agroecosystem Performance during Transition to Certified Organic Grain Production	Delate & Cambardella	Agronomy Journal 96, 1288-1298	2004	NA			NA			Ponisio et al. 2015
KC	yield.6	Yield	Yield and fruit quality of apple from conventional and organic production systems	Amarante et al.	Pesquisa Agropecuria Brasileira	2008	NA			NA			Ponisio et al. 2015
AC	yield.60	Yield	An economic comparison of organic and conventional grain crops in a long-term agroecological research (LTAR) site in Iowa	Delate et al.	American Journal of Alternative Agriculture	2003	NA			NA			Ponisio et al. 2015
AC	yield.61	Yield	On farm assessment of rice yield variability and productivity gaps between organic and conventional cropping systems	Delmotte et al.	European Journal of Agronomy	2011	NA			NA			Ponisio et al. 2015
AC	yield.62	Yield	Economics of organic and conventional hazelnut production in the Terme distrit of Samsun, Turkey	Demiryurek & Ceyhan	Renewable Agriculture and Food Systems 23(3), 217-227	2008	NA			NA			Ponisio et al. 2015
AC	yield.63	Yield	Crop yields over the first nine years of LTRAS, a long-term comparison of field crop systems in a Mediterranean climate	Denison et al.	Field Crops Research 86, 267-277	2004	NA			NA			Ponisio et al. 2015
AC	yield.66	Yield	Productivity and Profitability of Conventional and Alternative Farming Systems: A Long-Term On-Farm Paired Comparison	Dobbs & Smolik	Journal of Sustainable Agriculture 9(1), 63-79	1997	NA			NA			Ponisio et al. 2015
AC	yield.67	Yield	Cereal yield and quality as affected by nitorgen availability in organic and conventional arable crop rotations: A combined modeling and experimental approach	Doltra et al.	European Journal of Agronomy 34, 83-95	2010	NA			NA			Ponisio et al. 2015
KC	yield.7	Yield	Effect of organic manures and integrated nutrient management on yield potential of bell pepper (Capsicum Annuum) Varieties and on soil properties	Appireddy et al.	Archives of Agronomy and Soil Science 54(2), 127-137	2008	NA			NA			Ponisio et al. 2015
AC	yield.72	Yield	Effects of tillage intensity on nitrogen dynamics and productivity in legume-based grain systems	Drinkwater et al.	Plant and Soil 227, 99-113	2000	NA			NA			Ponisio et al. 2015
AC	yield.76	Yield	Effects of Cultural System (Organic and Conventional) on Growth, Photosynthesis and Yield Components of Sweet Corn under Semi-Arid Environment	Efthimiadou et al.	Notulae Botanicae Horti Agrobotanici Cluj-Napoca	2009	NA			NA			Ponisio et al. 2015
AC	yield.78	Yield	Influence of organic management with different crop rotations on selected productivity paramenters in a long-term Canadian field study	Entz et al.	International Society of Organic Agriculture Research Meeting, Adelaide, September 2005 (http://www.umanitoba.ca/outreach/naturalagriculture/articles/ppt/glenlea2005_files/frame.htm)	2005	NA			NA			Ponisio et al. 2015
AC	yield.86	Yield	Energy Efficiency of Conventional, Organic, and Alternative Cropping Systems for Food and Fuel at a Site in US. Midwest	Gelf& et al.	Environmental Science and Technology	2010	NA			NA			Ponisio et al. 2015
AC	yield.88	Yield	Content and yield of crude protein from winter pea grain, cultivated after different predecessors in conditions of organic and conventional production	Gerdgikova et al.	Agricultural Science and Technology	2012	NA			NA			Ponisio et al. 2015
AC	yield.91	Yield	Influence of organic amendments on growth, yield and quality of wheat and on soil properties during transition to organic production	Gopinath et al.	Nutrient Cycling in Agroecosystems 82, 51-60	2008	NA			NA			Ponisio et al. 2015
AC	yield.92	Yield	Organic farming in soybean-wheat cropping sequence	Gosavi et al.	Agric. Sci. Digest	2009	NA			NA			Ponisio et al. 2015
AC	yield.99	Yield	The effects of organic and conventional nutrient amendments on strawberry cultivation: Fruit yield and quality	Hargreaves et al.	Journal of the Science of Food and Agriculture 88, 2669-2675	2008	NA			NA			Ponisio et al. 2015
KC	profit.10	Profit	Crop yield and energy use in organic and conventional farming: A case study in north-east Italy	Dal Ferro N. et al.	European Journal of Agronomy	2017	86		37	47		10.1016/j.eja.2017.03.002	Smith et al. 2019
KC	profit.18	Profit	Conversion to organic strawberry management changes ecological processes	Gliessmann et al.	California Agriculture	1996	50	1	24	31		10.3733/ca.v050n01p24	Smith et al. 2019
JHT	yield.114	Yield	Effects of growing system and season on the alkaloid content and yield of different sweet L. angustifolius genotypes	Jansen et al	J of Applied Botany and Food Quality	2015	88		1	4		10.5073/JABFQ.2015.088.001	Smith et al. 2019
KC	yield.12	Yield	Comparative tree growth, phenology and fruit yield of several Japanese plum cultivars in two newly established orchards, organic and conventionally managed	Arroyo et al.	Spanish J of Agricultural Research	2013	NA			NA			Smith et al. 2019
JHT	yield.136	Yield	Effects of organic farming practices and salinity on yield and greenhouse gas emissions from a common bean crop	Kontopoulou et al	Scientia Horticulturae	2015	183		48	57		10.1016/j.scienta.2014.12.012	Smith et al. 2019
KC	yield.14	Yield	Mapping QTL, Selection Differentials, and the Effect of Rht-B1 under Organic and Conventionally Managed Systems in the Attila x CDC Go Spring Wheat Mapping Population	Asif et al.	Crop Science	2015	NA			NA			Smith et al. 2019
JHT	yield.141	Yield	Soil biological properties, soil losses and corn yield in long-term organic and conventional farming systems	Larsen et al	Soil and Tillage Research	2014	139		37	45		10.1016/j.still.2014.02.002	Smith et al. 2019
JHT	yield.147	Yield	A new method for analyzing agricultural land-use efficiency, and its application in organic and conventional farming systems in southern Germany	Lin & Hulsbergen	European J of Agronomy	2017	83		15	27		10.1016/j.eja.2016.11.003	Smith et al. 2019
JHT	yield.149	Yield	Variations in the Phytochemical Contents and Antioxidant Capacity of Organically and Conventionally Grown Italian Cauliflower (Brassica oleracea L. subsp botrytis): Results from a Three-Year Field Study	Lo Scalzo et al	J of Agricultural and Food Chemistry	2013	61	43	10335	10344		10.1021/jf4026844	Smith et al. 2019
AC	yield.16	Yield	Comparison of organic and conventional managements on yields, nutrients and weeds in a corn-cabbage rotation	Bajgai et al	Renewable Agriculture and Food Systems	2015	30	2	132	142		10.1017/S1742170513000264	Smith et al. 2019
JHT	yield.167	Yield	Effects of agri-environmental and organic rice farming on yield and macrophyte community in Mediterranean paddy fields	Martinez-Eixarch et al.	Paddy and Water Environment	2017	15	3	457	468		10.1007/s10333-016-0563-x	Smith et al. 2019
JHT	yield.171	Yield	Evaluating crop yields, crop quality and soil fertility from organic and conventional farming systems in South Africa's southern Cape	Mashele & Auerbach	South African J of Geology	2016	119	1	25	32		10.2113/gssajg.119.1.25	Smith et al. 2019
JHT	yield.177	Yield	Agronomic performance, carbon storage and nitrogen utilisation of long-term organic and conventional stockless arable systems in Mediterranean area	Migliorini et al	European J of Agronomy	2014	52		138	145		10.1016/j.eja.2013.09.017	Smith et al. 2019
JHT	yield.182	Yield	Effect of organic and conventional farming systems on nitrogen use efficiency of potato, maize and vegetables in the Central highlands of Kenya	Musyoka et al.	European J of Agronomy	2017	86		24	36		10.1016/j.eja.2017.02.005	Smith et al. 2019
JHT	yield.190	Yield	Effects of Cultivation Systems and Environmental Conditions on Peppermint (Mentha x piperita L.) Biomass Yield and Oil Content	Oroian et al.	NOTULAE BOTANICAE HORTI AGROBOTANICI CLUJ-NAPOCA	2017	45	2	576	581		10.15835/nbha45210857	Smith et al. 2019
Rob	yield.196	Yield	The influence of organic and conventional fertilisation and crop protection practices, preceding crop, harvest year and weather conditions on yield and quality of potato (Solanum tuberosum) in a long-term management trial	Palmer et al.	European J of Agronomy	2013	49		83	92		10.1016/j.eja.2013.03.004	Smith et al. 2019
Rob	yield.197	Yield	Organic Cropping System Effects on Fiber Quality of Three Cotton Cultivars in Greece	Patsiali et al.	Agronomy Journal	2014	106	4	1365	1370		10.2134/agronj13.0553	Smith et al. 2019
Rob	yield.199	Yield	Growth, phenology and fruit set of Prunus armeniaca L. (cv. Ninfa) grafted on two rootstocks in organic and conventional management	Perez-Romero et al.	Horticultural Science	2014	41	3	101	106			Smith et al. 2019
AC	yield.22	Yield	Eleven-year results on soft and durum wheat crops grown in an organic and in a conventional low input cropping system	Benincasa et al	Italian J of Agronomy	2016	11	2	77	84		10.4081/ija.2016.726	Smith et al. 2019
Rob	yield.227	Yield	COCOA AND TOTAL SYSTEM YIELDS OF ORGANIC AND CONVENTIONAL AGROFORESTRY VS. MONOCULTURE SYSTEMS IN A LONG-TERM FIELD TRIAL IN BOLIVIA	Schneider et al.	Experimental Agriculture	2017	53	3	351	374		10.1017/S0014479716000417	Smith et al. 2019
AC	yield.24	Yield	A participative network of organic and conventional crop farms in the Seine Basin (France) for evaluating nitrate leaching and yield performance	Benoit et al.	Agricultural Systems	2016	145		105	113		10.1016/j.agsy.2016.07.005	Smith et al. 2019
Rob	yield.246	Yield	Comparison of tuber yield, nutritional quality and soil health under organic versus conventional production in tuberous vegetables	Suja	Indian J of Agricultural Sciences	2013	83	11	1153	1158			Smith et al. 2019
Rob	yield.249	Yield	Yield, quality and soil health under organic vs conventional farming in taro	Suja et al.	Scientia Horticulturae	2017	218		334	343		10.1016/j.scienta.2017.02.006	Smith et al. 2019
Rob	yield.272	Yield	FARMING METHODS EFFECTS ON THE SOIL FERTILITY AND CROP PRODUCTION UNDER A RICE-VEGETABLES CROPPING SEQUENCES	Wang et al.	J od Plant Nutrition	2014	37	9	1498	1513		10.1080/01904167.2014.881876	Smith et al. 2019
Rob	yield.283	Yield	Evaluating Cultivars for Organic Farming: Maize, Soybean, and Wheat Genotype by System Interactions in Eastern Nebraska	Wortman et al.	Agroecology and Sustainable Food Systems	2013	37	8	915	932		10.1080/21683565.2013.764956	Smith et al. 2019
KC	yield.3	Yield	Crop yields and supply of nitrogen compared in conventional and organic farming systems	Alaru et al.	Agricultural and Food Science	2014	NA			NA			Smith et al. 2019
AC	yield.34	Yield	The effect of organic and conventional management on the yield and quality of wheat grown in a long-term field trial	Bilsborrow et al	European J of Agronomy	2013	51		71	80		10.1016/j.eja.2013.06.003	Smith et al. 2019
AC	yield.39	Yield	The long-term effects of conventional and organic cropping systems, tillage managements and weather conditions on yield and grain quality of durum wheat (Triticum durum Desf.) in the Mediterranean environment of Central Italy	Campiglia et al	Field Crops Research	2015	176		34	44		10.1016/j.fcr.2015.02.021	Smith et al. 2019
AC	yield.46	Yield	Productivity and nitrogen benefits of late-season legume cover crops in organic wheat production	Cicek et al	Canadian J of Plant Science	2014	94	4	771	783		10.4141/CJPS2013-130	Smith et al. 2019
AC	yield.69	Yield	Comparative analysis of performance and stability among composite cross populations, variety mixtures and pure lines of winter wheat in organic and conventional cropping systems	Doring et al	Field Crops Research	2015	183		235	245		10.1016/j.fcr.2015.08.009	Smith et al. 2019
AC	yield.74	Yield	Comparison of Surface Water Quality and Yields from Organically and Conventionally Produced Sweet Corn Plots with Conservation and Conventional Tillage	Edgell et al	J of Environmental Quality	2015	44	6	1861	1870		10.2134/jeq2015.02.0074	Smith et al. 2019
AC	yield.80	Yield	Yield and apparent dry matter and nitrogen balances for muskmelon in a long-term comparison between an organic and a conventional low input cropping system	Farneseli et al	Italian J of Agronomy	2015	10	3	117	123		10.4081/ija.2015.630	Smith et al. 2019
AC	yield.81	Yield	Nine-year results on maize and processing tomato cultivation in an organic and in a conventional low input cropping system	Farneselli et al	Italian J of Agronomy	2013	8	1	9	13		10.4081/ija.2013.e2	Smith et al. 2019
AC	yield.84	Yield	Organic management and legume presence maintained phosphorus bioavailability in a 17-year field crop experiment	Gallaher & Snapp	Renewable Agriculture and Food Systems	2015	30	3	211	222		10.1017/S1742170513000380	Smith et al. 2019
AC	yield.95	Yield	Specialty Melon Cultivar Evaluation under Organic and Conventional Production in Florida	Guan et al	Horttechnology	2013	23	6	905	912			Smith et al. 2019
AC	yield.97	Yield	Crop agronomic performance under a six-year continuous organic no-till system and other tilled and conventionally-managed systems in the northern Great Plains of Canada	Halde et al	Agriculture Ecosystems and Environment	2015	213		121	130		10.1016/j.agee.2015.07.029	Smith et al. 2019
Rob	yield.224	Yield	Six-year transition from conventional to organic farming: effects on crop production and soil quality	Sacco et al	European J of Agronomy	2015	69		10	20		10.1016/j.eja.2015.05.002	Smith et al. 2019
JMT	Soil.1	Soil	On Farm assesment of Soil Quality in California's Central Valley	S. S. Andrews, J. P. Mitchell, R. Mancinelli, D. L. Karlen, T. K. Hartz, W. R. Horwath, G. S. Pettygrove, K. M. Scow, D. S. Munk	Agronomy Journal	2002	94		12	23			Gattinger et al 2012
JMT	Soil.2	Soil	Topsoil Characteristics from a Paired Farm Survey of Organic versus Conventional Farming in Southern England	S. M. Armstrong Brown, H. F. Cook, H. C. Lee	Biological Agriculture and Horticulture	2000	18		37	54			Gattinger et al 2012
JMT	Soil.3	Soil	Biochemical variability of olive-orchard soils under different management systems	E. Benitez, R. Nogales, M. Campos, F. Ruano	Applied Soil Ecology	2006	32		221	2231			Gattinger et al 2012
JMT	Soil.4	Soil	Yield, Boll Distribution and Fibre Quality of Hybrid Cotton (Gossypium hirsutum L.) as influenced by Organic and Modern Methods of Cultivation	D. Blaise	Journal of Agronomy and Crop Science	2006	192		248	256			Gattinger et al 2012
JMT	Soil.5	Soil	Ecology of Earthworms under the ‘Haughley Experiment’ of Organic and Conventional Management Regimes	R. J. Blakemore	Biological Agriculture and Horticulture	2000	18		141	159			Gattinger et al 2012
JMT	Soil.6	Soil	Effect of seasonality and agricultural practices on occurrence of entomopathogenic nematodes and soil characteristics in La Rioja (Northern Spain)	R. Campos-Herrera, A. Piedra-Buena, M. Escuer, B. Montalban, C. Gutierrez	Pedobiogia	2010	53		253	258			Gattinger et al 2012
JMT	Soil.7	Soil	Effect of different management strategies on soil quality of citrus orchards in Southern Italy	S. Canali, E. Di Bartolomeo, A. Trinchera, L. Nisini, F. Titarelli, F. Intrigliolo, G. Rocuzzo, M. L. Calabretta	Soil Use and Management	2009	25		34	42			Gattinger et al 2012
JMT	Soil.9	Soil	Soil properties, crop production and greenhouse gas emissions frim organic and inorganic fertilizer-based arable cropping systems	N. Chirinda, J. E. Olesen, J. R. Porter, P. Schjonning	Agriculture, Ecosystems and Environment	2010	136		199	208			Gattinger et al 2012
JMT	Soil.10	Soil	Can Organic Farming Contribute to Carbon Sequestration? A Survey in a Pear Orchard in Emilia-Romagna Region, Italy	C. Ciavatta, P. Gioacchini, D. Montecchio	16th IFOAM Organic World Congress, Modena, Italy, June 16-20, 2008	2008							Gattinger et al 2012
JMT	Soil.11	Soil	Changes in Soil Chemical Properties Resulting from Organic and Low-Input Farming Practices	M. S. Clark, W. R. Horwath, C. Shennan, K. M. Scow	Agronomy Journal	1998	90		662	671			Gattinger et al 2012
JMT	Soil.12	Soil	Transition to certified organic grain production	K. Delate, C. Cambardella	Agronomy Journal	2004	96		1288	1298			Gattinger et al 2012
JMT	Soil.13	Soil	Organic Wheat Production and Soil Nutrient Status in a Mediterranean Climatic Zone	A. M. Deria, R. W. Bell & G. W. O'hara	Journal of Sustainable Agriculture	2003	21		21	47			Gattinger et al 2012
JMT	Soil.14	Soil	Soil chemical properties under organic and conventional management in southern New South Wales	J. W. Derrick, D. C. Dumaresq	Australian Journal of Soil Research	1999	37		1047	1055			Gattinger et al 2012
JMT	Soil.16	Soil	Energetic eco-physiology of the soil microbiota in two landscapes of southern and northern Germany	O. Dilly, K. Winter, A. Lang, J. C. Munch	Journal of Plant Nutrition and Soil Science	2001	164		407	413			Gattinger et al 2012
JMT	Soil.17	Soil	Biodynamic vs. Conventional Farming Effects on Soil Structure Expressed by Simulated Potential Productivity	P. Drrogers, J. Bouma	Soil Science Society of America Journal	1996	60		1552	1558			Gattinger et al 2012
JMT	Soil.18	Soil	Changes of soil chemical, microbiological, and enzymatic variables in relation to management regime and the duration of organic farming in Phaseolus vulgaris	E. Efthimiadou, E. M Papatheodorou. N. Monokrousos, G. P. Stamou	Journal of Biological Research-Thessaloniki 14: 151 – 159,	2010	14		151	159			Gattinger et al 2012
JMT	Soil.19	Soil	A comparison of environmental, soil fertility, yield, and economical effects in six cropping systems based on an 8-year experiment in Norway	R. Eltun, A. Korsæth, O. Nordheim	Agriculture, Ecosystems and Environment	2002	90		155	168			Gattinger et al 2012
JMT	Soil.20	Soil	The viability of cotton-based organic farming systems in India	F. Eyhorn, M. Ramakrishnan, P. Mäder	International Journal of Agricultural Sustainability	2007	5		25	38			Gattinger et al 2012
JMT	Soil.21	Soil	Soil Microbial Populations and Activities under Conventional and Organic Management	D.G. Fraser, J. W. Doran, W.W. Sahs, G. W. Lesoing	Journal of Environmental Quality	1988	17		585	590			Gattinger et al 2012
JMT	Soil.22	Soil	The effect farming system on labile fractions of organic matter in Calcari-Epileptic Regosols	J. K. Friedel	Journal of Plant Nutrition and Soil Science	2000	163		41	45			Gattinger et al 2012
JMT	Soil.23	Soil	Soil enzymes, nematode community and selected physico-chemical properties as soil quality indicators in organic and conventional olive oil farming: Influence of seasonality and site features	R. Garcıa-Ruiz, V. Ochoa, B. Vinegla, M.B. Hinojosa, R. Pena-Santiago, G. Liebanas, J.C. Linares, J.A. Carreira	Applied Soil Ecology	2009	41		305	314			Gattinger et al 2012
JMT	Soil.24	Soil	Impact of farming practices on soil quality in North Dakota	J. Gardner, S. A. Glancy	In: J. W. Doran and A. J. Jones (Eds.). Madison, WI., SSSA. SSSA Spec. Publ	1996	49		337	343			Gattinger et al 2012
JMT	Soil.25	Soil	Chemical properties, microbial biomass, and activity differ between soils of organic and conventional horticultural systems under greenhouse and open field management: a case study	T. Ge, S. Nie, J. Wu, J. Shen, H. Xiao, C. Tong, D. Huang, Y. Hong, K. Iwasaki	Journal of Soils and Sediments	2011	11		25	36			Gattinger et al 2012
JMT	Soil.27	Soil	Systematic method for rating soil quality of conventional, organic, and integrated apple orchards in Washington State	J.D. Glover, J.P. Reganold, P.K. Andrews	Agriculture, Ecosystems & Environment	2000	80		29	45			Gattinger et al 2012
JMT	Soil.28	Soil	Long-term changes in soil fertility in organic arable farming systems in England, with particular reference to phosphorus and potassium	P. Gosling, M. Shepherd	Agriculture, Ecosystems & Environment	2005	105		425	432			Gattinger et al 2012
JMT	Soil.29	Soil	Land-Use Intensity Effects on Soil Organic Carbon Accumulation Rates	A. S. Grandy, G. P. Robertson	Ecosystems	2007	10		58	73			Gattinger et al 2012
JMT	Soil.30	Soil	Organic and biodynamic cultivation - a possible way of increasing humus capital, improving soil fertility and providing a carbon sink in Nordic conditions	A. Granstedt, L. Kjellenberg	16th IFOAM Organic World Congress, Modena, Italy, June 16-20, 2008	2008							Gattinger et al 2012	Archived at http://orgprints.org/12625/1/Granstedt_12625_ed.doc
JMT	Soil.31	Soil	Coffee agroecosystem performance under full sun, shade, conventional and organic management regimes in Central America	J. Haggar, M. Barrios, M. Bolanos, M. Merlo, P. Moraga, R. Munguia, A. Ponce, S. Romero, G. Soto, C. Staver, E. de M. F. Virginio	Agroforestry Systems	2011	82		285	301			Gattinger et al 2012
JMT	Soil.32	Soil	Impact of fertilizer type and rate on carbon and nitrogen pools in a sandy Cambisol	F. Heitkamp, J. Raupp, B. Ludwig	Plant and Soil	2009	319		259	275			Gattinger et al 2012
JMT	Soil.34	Soil	Long-Term Effect of Organic and Mineral Fertilization on Soil Physical Properties Under Greenhouse and Outdoor Management Practices	J. F. Herencia, P. A. Garcia-Galavis, C. Maqueda	Pedosphere	2011	21		443	453			Gattinger et al 2012
JMT	Soil.35	Soil	Effects of ecological farming on several soil properties	P. Kahle, C. Baum, M. Borchwardt	In: Heß, J and Rahmann, G (Eds.) Ende der Nische, Beiträge zur 8. Wissenschaftstagung Ökologischer Landbau, kassel university press GmbH, Kassel.	2005							Gattinger et al 2012	Archived at http://orgprints.org/3205/1/3205.pdf
JMT	Soil.36	Soil	Comparison of Long-Term Organic and Conventional Crop–Livestock Systems on a Previously Nutrient-Depleted Soil in Sweden	H. Kirchmann, L. Bergström, T. Kätterer, L. Mattsson, S. Gesslein	Agronomy Journal	2007	99		960	972			Gattinger et al 2012
JMT	Soil.37	Soil	The Relationship between Carbon Input, Aggregation, and Soil Organic Carbon Stabilization in Sustainable Cropping Systems	A. Kong, J. Six, D. Bryant, R. F. Denison, C. van Kessel	Soil Science Society of America Journal	2005	69		1078	1085			Gattinger et al 2012
JMT	Soil.38	Soil	Reduced nitrate leaching and enhanced denitrifier activity and efficiency in organically fertilized soils	S. B. Kramer, J. P. Reganold, J. D. Glover, B. J. M. Bohannan, H. A. Mooney	PNAS	2006	103		4522	4527			Gattinger et al 2012
JMT	Soil.39	Soil	Consequences of Conventional versus Organic farming on Soil Carbon: Results from a 27-Year Field Experiment	J. Leifeld, R. Reiser, H.-R. Oberholzer	Agronomy Journal	2009	101		1204	1218			Gattinger et al 2012
JMT	Soil.40	Soil	Soil organic carbon and biological indicators in an Acrisol under tillage systems and organic management in north-eastern Brazil	L. F. C. Leite, C., F. C. Oliveira, A. S. F. Araújo, S. R. S. Galvão, J. O. Lemos, E. F. L. Silva	Australian Journal of Soil Research	2010	48		258	265			Gattinger et al 2012
JMT	Soil.41	Soil	Impact of organic production on soil quality indicators	M. A. Liebig, J. W. Doran	Journal of Environmental Quality	1999	28		1601	1609			Gattinger et al 2012
JMT	Soil.43	Soil	Effects of organic management on water-extractable organic matter and C mineralization in European arable soils	S. Marinari, K. Liburdi, A. Fliessbach, K. Kalbitz	Soil & Tillage Research	2010	106		211	217			Gattinger et al 2012
JMT	Soil.44	Soil	Soil Carbon and nitrogen mineralization kinetics in organic and conventional three-year cropping systems	S. Marinari, A. Lagomarsino, M.C. Moscatelli, A. Di Tizio, E. Campiglia	Soil & Tillage Research	2010	109		161	168			Gattinger et al 2012
JMT	Soil.45	Soil	Comparison of organic and conventional stockless arable systems: A multidisciplinary approach to soil quality evaluation	M. Mazzoncini, S. Canali, M. Giovannetti, M. Castagnoli, F. Tittarelli, D. Antichi, R. Nannelli, C. Cristani, P. Barberi	Applied Soil Ecology	2010	44		124	132			Gattinger et al 2012
JMT	Soil.46	Soil	Chemical and biochemical properties in a silty loam soil under conventional and organic management	S. Melero, E. Madejo, J. C. Ruiz Porras, J. F. Herencia	European Journal of Agronomy	2007	26		327	334			Gattinger et al 2012
JMT	Soil.47	Soil	Soil microbial communities and activities under intensive organic and conventional vegetable farming in West Java, Indonesia	B. Moeskops, Sukristiyonubowo, D. Buchan, S. Sleutel, L. Herawaty, E. Husen, R. Saraswati, D. Setyorini, S. De Neve	Applied Soil Ecology	2010	45		112	120			Gattinger et al 2012
JMT	Soil.48	Soil	Temporal Variation in Aggregate Stability on Conventional and Alternative Farms	D. J. Mulia, L. M. Huyck, J. P. Reganold		1992	56		1620	1624			Gattinger et al 2012
JMT	Soil.49	Soil	Effects of cropping systems on soil organic matter in a pair of conventional and biodynamic mixed cropping farms in Canterbury, New Zealand	T. Murata, K. M. Goh	Biology and Fertility of Soils	1997	25		372	381			Gattinger et al 2012
JMT	Soil.50	Soil	Soil quality variables in organically and conventionally cultivated field sites	N. Monokrousos, E.M. Papatheodorou, J. D. Diamantopoulos, G. P. Stamou	Soil Biology & Biochemistry	2006	38		1282	1289			Gattinger et al 2012
JMT	Soil.51	Soil	Nutrient budgets and status in three pairs of conventional and alternative mixed cropping farms in Canterbury, New Zealand	M. L. Nguyen, R, J. Haynes, K. M. Goh	Agriculture, Ecosystems and Environment	1995	52		149	162			Gattinger et al 2012
JMT	Soil.53	Soil	Microbial biomass and enzyme activity in vineyard soils under organic and conventional farming systems	N. Okur, A. Altindisli, M. Cengel, S. Göcmez, H. H. Kayakcioglu	Turk J Agric For	2009	33		413	423			Gattinger et al 2012
JMT	Soil.54	Soil	Nutrient evolution in soil and cereal yield under different fertilization type in dryland	G. Pardo, J. Cavero, J. Aibar, C. Zaragoza	Nutr Cycl Agroecosyst	2009	84		267	279			Gattinger et al 2012
JMT	Soil.55	Soil	Phospholipid fatty acid profiles and C availability in wet-stable macro-aggregates from conventionally and organically farmed soils	S. O. Petersen, K. Debosz, P. Schjonning, B. T. Christensen, S. Elmholt	Geoderma	1997	78		181	196			Gattinger et al 2012
JMT	Soil.56	Soil	Organic Agriculture and Nitrous Oxide Emissions at Sub-Zero Soil Temperatures	R. T. Phillips	Journal of Environmental Quality	2007	36		23	30			Gattinger et al 2012
JMT	Soil.57	Soil	Vineyard soils under organic and conventional management—microbial biomass and activity indices and their relation to soil chemical properties	B. Probst, C. Schüler, R. G. Joergensen	Biology and Fertility of Soils	2008	44		443	450			Gattinger et al 2012
JMT	Soil.59	Soil	Mycorrhizae activity and diversity in conventional and organic apple orchards from Brazil	S. Purin, O. Klauberg Filho, S. L. Stürmer	Soil Biology & Biochemistry	2006	38		1831	1839			Gattinger et al 2012
JMT	Soil.60	Soil	Methan and nitrous oxide emissions from organic and conventional rice cropping systems in Southeast China	Q. Yanmei, L. Shuwei, G. Yanquin, L. Qiaohui, Z. Jianwen	Biology and Fertility of Soils	2010	46		825	834			Gattinger et al 2012
JMT	Soil.61	Soil	Sustainability of ecological and conventional agricultural systems in Bangladesh: an assessment based on environmental, economic and social perspectives	G. Rasul, G. B. Thapa	Agricultural Systems	2004	79		327	351			Gattinger et al 2012
JMT	Soil.63	Soil	Fruit and Soil Quality of Organic and Conventional Strawberry Agroecosystems	J. P. Reganold, P. K. Andrews, J. R. Reeve, L. Carpenter-Boggs, C. W. Schadt, J. R. Alldredge, C. F. Ross, N. M. Davies, J. Zhou	PLoS ONE	2010	5					10.1371/journal.pone.0012346	Gattinger et al 2012
JMT	Soil.64	Soil	Organic and inorganic P reserves in rain-fed and irrigated calcareous soils under long-term organic and conventional agriculture	J. Romanyà, P. Rovira	Geoderma	2009	151		378	386			Gattinger et al 2012
JMT	Soil.66	Soil	Soil quality aspects of humid sandy loams as influenced by organic and conventional long-term management	P. Schjønning, S. Elmholt, L. J. Munkholm, K. Debosz	Agriculture, Ecosystems and Environment	2002	88		195	214			Gattinger et al 2012
JMT	Soil.68	Soil	Management intensity – not biodiversity – the driver of ecosystem services in a long-term row crop experiment	S. S. Snapp, L. E. Gentry, R. Harwood	Agriculture, Ecosystems and Environment	2010							Gattinger et al 2012
JMT	Soil.69	Soil	Potential Long-Term Benefits of No-Tillage and Organic Cropping Systems for Grain Production and Soil Improvement	J.R. Teasdale, C.B. Coffman, R.W. Mangum	Agronomy Journal	2007	99					10.2134/agronj2006.0362	Gattinger et al 2012
JMT	Soil.70	Soil	Effects of organic versus conventional management on chemical and biological parameters in agricultural soils	A. D. van Diepeningen, O. J. de Vos, G. W. Korthals, A. H.C. van Bruggen	Applied Soil Ecology	2006	31		120	135			Gattinger et al 2012
JMT	Soil.71	Soil	Influence of farming practice, crop type and soil properties on the abundance of Enchytraeidae (Oligochaeta) in Greek agricultural soils	E. Vavoulidou, A. Coors, K. Dózsa-Farkas, J. Römbke	Soil Organisms	2009	81		197	212			Gattinger et al 2012
JMT	Soil.72	Soil	Long-term impact of farming practices on soil organic carbon and nitrogen pools and microbial biomass and activity	Y. Wang, C. Tu, L. Cheng, C. Li L. F. Gentry, G. D. Hoyt, X. Zhang, S. Hub	Soil & Tillage Research	2011	117		8	16			Gattinger et al 2012
JMT	Soil.73	Soil	Comparison of conventional and alternative vegetable farming systems on the properties of a yellow earth in New South Wales	A.T. Wells, K.Y. Chan, and P.S. Cornish	Agriculture, Ecosystems and Environment	2000	80		47	60			Gattinger et al 2012
JMT	Soil.74	Soil	High Yielding Organic Crop Management Decreases Plant-Available but Not Recalcitrant Soil Phosphorus	C. Welsh, M. Tenuta, D. N. Flaten, J. R. Thiessen-Martens, M. H. Entz	Agronomy Journal	2009	101		1027	1035			Gattinger et al 2012
